# Supplementary material for: Identification of Prognostic Glycolysis-Related lncRNA Signature in Tumor Immune Microenvironment of Hepatocellular Carcinoma
Source: Front Mol Biosci. 2021 Apr 22;8:645084. doi: 10.3389/fmolb.2021.645084 (PMC8100457; doi:10.3389/fmolb.2021.645084)
Supplement: Supplementary file 4 [file table3.xlsx]

## Sheet: S1
Table S1. 1,699 glycolysis-related lncRNAs
Glycolysis gene	lncRNA	cor	pvalue
ENO1	AL031985.3	0.42785	4.44498e-18
GNPDA1	AL031985.3	0.463749	2.42784e-21
GNPDA2	AL031985.3	0.441133	3.05788e-19
NDC1	AL031985.3	0.568308	2.2489e-33
NUP107	AL031985.3	0.554975	1.3475e-31
NUP155	AL031985.3	0.4864	1.31586e-23
NUP160	AL031985.3	0.432352	1.81809e-18
NUP188	AL031985.3	0.472054	3.74837e-22
NUP205	AL031985.3	0.506729	8.64563e-26
NUP37	AL031985.3	0.500738	3.93738e-25
NUP43	AL031985.3	0.521928	1.6097e-27
NUP62	AL031985.3	0.583762	1.54082e-35
NUP93	AL031985.3	0.51731	5.51676e-27
PFKFB4	AL031985.3	0.419409	2.29288e-17
SEH1L	AL031985.3	0.462893	2.93485e-21
TPR	AL031985.3	0.428873	3.63213e-18
ALDOA	LINC00261	-0.420504	1.85801e-17
PPP2R5D	AL035587.1	0.406313	2.6719e-16
PFKFB3	AP000759.1	0.407552	2.1277e-16
PKM	AP000759.1	0.419172	2.39901e-17
PKM	AC005586.2	0.497437	8.96231e-25
PGP	AC002456.1	0.545097	2.4881e-30
NUP98	AP001318.2	0.403784	4.24025e-16
POM121	AP001318.2	0.401843	6.02821e-16
TPR	AP001318.2	0.469697	6.40369e-22
AAAS	LINC00847	0.437776	6.08258e-19
ALDOA	LINC00847	0.442721	2.20299e-19
ENO2	LINC00847	0.423699	1.00159e-17
PFKFB3	LINC00847	0.432631	1.71939e-18
PFKP	LINC00847	0.449376	5.47045e-20
PKM	LINC00847	0.454987	1.65025e-20
PGP	AL451165.2	0.454534	1.81906e-20
NUP153	MID1IP1-AS1	0.461291	4.17921e-21
NUP160	MID1IP1-AS1	0.469555	6.61175e-22
NUP205	MID1IP1-AS1	0.44718	8.69279e-20
NUP98	MID1IP1-AS1	0.402647	5.21199e-16
POM121	MID1IP1-AS1	0.567028	3.35812e-33
POM121C	MID1IP1-AS1	0.462555	3.16279e-21
TPR	MID1IP1-AS1	0.416469	4.01612e-17
AAAS	PITPNA-AS1	0.472003	3.79244e-22
NUP37	PITPNA-AS1	0.429143	3.44314e-18
NUP88	PITPNA-AS1	0.433259	1.51597e-18
RAE1	PITPNA-AS1	0.422781	1.19702e-17
PGP	AL031665.2	0.490068	5.44682e-24
PPP2R1A	AL031665.2	0.417236	3.47136e-17
PGP	AC010531.6	0.744065	3.86044e-67
TPI1	AC010531.6	0.422554	1.2508e-17
PFKFB1	AC010205.1	0.415775	4.58141e-17
AAAS	NIFK-AS1	0.552019	3.25799e-31
GNPDA2	NIFK-AS1	0.450686	4.1438e-20
NDC1	NIFK-AS1	0.417365	3.38758e-17
NUP107	NIFK-AS1	0.47124	4.51239e-22
NUP35	NIFK-AS1	0.545695	2.09091e-30
NUP37	NIFK-AS1	0.505071	1.31917e-25
NUP54	NIFK-AS1	0.414953	5.35156e-17
NUP85	NIFK-AS1	0.51686	6.21304e-27
NUP93	NIFK-AS1	0.419454	2.27303e-17
PKM	NIFK-AS1	0.408192	1.89059e-16
RAE1	NIFK-AS1	0.437129	6.93881e-19
AAAS	SNHG17	0.422032	1.38376e-17
PPP2R1A	SNHG17	0.470896	4.87911e-22
RAE1	SNHG17	0.424381	8.77197e-18
NUP35	SNHG14	0.409358	1.52408e-16
NUP43	SNHG14	0.445519	1.23099e-19
TPR	SNHG14	0.406016	2.82125e-16
GNPDA1	AC083799.1	0.404455	3.75231e-16
GNPDA2	AC083799.1	0.412408	8.63541e-17
NUP107	AC083799.1	0.453376	2.33338e-20
NUP214	AC083799.1	0.408848	1.67501e-16
NUP35	AC083799.1	0.424831	8.03464e-18
NUP37	AC083799.1	0.438585	5.15758e-19
AAAS	AC007541.1	0.465864	1.51589e-21
NUP107	AC007541.1	0.464831	1.90883e-21
NUP37	AC007541.1	0.435487	9.67725e-19
NUP85	AC007541.1	0.528537	2.67262e-28
PGP	AC110285.6	0.489148	6.80236e-24
NUP153	AC015849.3	0.434876	1.09482e-18
NUP155	AC015849.3	0.409412	1.50872e-16
NUP160	AC015849.3	0.448468	6.6273e-20
NUP58	AC015849.3	0.483095	2.88708e-23
NUP98	AC015849.3	0.425921	6.49355e-18
POM121	AC015849.3	0.549799	6.28649e-31
POM121C	AC015849.3	0.421768	1.45636e-17
RANBP2	AC015849.3	0.494831	1.70528e-24
TPR	AC015849.3	0.551327	4.00066e-31
ADPGK	AC138207.5	0.429934	2.94365e-18
GNPDA1	AC138207.5	0.439708	4.09819e-19
HK1	AC138207.5	0.526878	4.21042e-28
HK3	AC138207.5	0.674585	5.5739e-51
NUP93	AC138207.5	0.471423	4.32833e-22
PKM	AC138207.5	0.603817	1.58789e-38
GAPDH	DANCR	0.477015	1.19846e-22
NDC1	AL109613.1	0.415438	4.88282e-17
ENO2	LINC01436	0.445629	1.20302e-19
PGP	ST7-AS1	0.597702	1.36112e-37
GNPDA1	AC055822.1	0.400235	8.05446e-16
PPP2R1A	AC055822.1	0.408057	1.93845e-16
PGP	AC040169.1	0.493974	2.10444e-24
AAAS	AC074117.1	0.461342	4.13243e-21
NDC1	AC074117.1	0.417861	3.08194e-17
NUP107	AC074117.1	0.467308	1.0972e-21
NUP160	AC074117.1	0.463201	2.74152e-21
NUP214	AC074117.1	0.442509	2.30207e-19
NUP37	AC074117.1	0.462692	3.06808e-21
NUP85	AC074117.1	0.4271	5.15198e-18
TPR	AC074117.1	0.421505	1.53201e-17
PGP	AC015917.2	0.416146	4.26988e-17
ALDOB	AC009093.5	0.409776	1.41042e-16
ALDOA	TNRC6C-AS1	0.450668	4.1594e-20
PKM	TNRC6C-AS1	0.403896	4.15434e-16
PFKFB3	AC007388.1	0.445986	1.11644e-19
PFKP	AC007388.1	0.539954	1.09317e-29
GNPDA2	EIF3J-DT	0.476461	1.36229e-22
NUP35	EIF3J-DT	0.417832	3.09923e-17
NUP54	EIF3J-DT	0.48988	5.70014e-24
NUP85	EIF3J-DT	0.469646	6.47694e-22
PFKFB3	EIF3J-DT	0.53608	3.27898e-29
PFKP	EIF3J-DT	0.560011	2.93462e-32
PKM	EIF3J-DT	0.475465	1.71475e-22
RANBP2	EIF3J-DT	0.447101	8.83783e-20
PGP	AC026304.1	0.438011	5.79821e-19
NUP153	AC005332.6	0.407398	2.18862e-16
NUP155	AC005332.6	0.410014	1.34944e-16
NUP160	AC005332.6	0.40098	7.04446e-16
NUP85	AC005332.6	0.517779	4.87127e-27
POM121	AC005332.6	0.432193	1.87658e-18
POM121C	AC005332.6	0.478628	8.23739e-23
PPP2R5D	AC005332.6	0.410687	1.19058e-16
TPR	AC005332.6	0.479243	7.13584e-23
NDC1	AC006026.3	0.422295	1.31507e-17
RAE1	HAGLR	0.431555	2.13197e-18
NUP35	AC007383.2	0.433316	1.49859e-18
RAE1	AC007383.2	0.407516	2.14171e-16
ADPGK	RAD51-AS1	0.420503	1.85824e-17
GNPDA2	RAD51-AS1	0.422915	1.16626e-17
NUP214	RAD51-AS1	0.424454	8.64736e-18
NUP35	RAD51-AS1	0.407937	1.98195e-16
NUP43	RAD51-AS1	0.406067	2.79489e-16
TPR	RAD51-AS1	0.407086	2.31809e-16
NUP85	AC091271.1	0.418917	2.51927e-17
NUP153	AL360181.2	0.45797	8.64643e-21
POM121	AL360181.2	0.473825	2.50035e-22
RANBP2	AL360181.2	0.419561	2.22669e-17
TPR	AL360181.2	0.45749	9.59728e-21
AAAS	Z95115.1	0.475176	1.83305e-22
NDC1	Z95115.1	0.45314	2.4542e-20
NUP107	Z95115.1	0.436948	7.19816e-19
NUP37	Z95115.1	0.443206	1.99263e-19
NUP85	Z95115.1	0.46641	1.34174e-21
PGP	ENTPD3-AS1	0.452049	3.09953e-20
PKM	AC092687.3	0.402401	5.4493e-16
PPP2R1A	AC092687.3	0.410195	1.30484e-16
PGP	MHENCR	0.513112	1.6628e-26
PGP	AC074032.1	0.451312	3.62639e-20
AAAS	TMEM147-AS1	0.536201	3.16848e-29
NUP107	TMEM147-AS1	0.509474	4.27295e-26
NUP188	TMEM147-AS1	0.437152	6.9055e-19
NUP214	TMEM147-AS1	0.508874	4.98754e-26
NUP37	TMEM147-AS1	0.465635	1.59544e-21
NUP93	TMEM147-AS1	0.431586	2.11879e-18
RAE1	TMEM147-AS1	0.447871	7.51638e-20
NUP62	AL365203.2	0.451657	3.3698e-20
PFKFB3	AL365203.2	0.450696	4.13432e-20
PKM	AL365203.2	0.422023	1.38612e-17
AAAS	PTOV1-AS1	0.569495	1.54786e-33
ADPGK	PTOV1-AS1	0.452479	2.82695e-20
ALDOA	PTOV1-AS1	0.415921	4.45573e-17
GNPDA2	PTOV1-AS1	0.520214	2.54805e-27
NDC1	PTOV1-AS1	0.53254	8.83465e-29
NUP107	PTOV1-AS1	0.577692	1.12603e-34
NUP155	PTOV1-AS1	0.467825	9.76782e-22
NUP160	PTOV1-AS1	0.443601	1.83586e-19
NUP188	PTOV1-AS1	0.573551	4.27158e-34
NUP205	PTOV1-AS1	0.497189	9.52999e-25
NUP214	PTOV1-AS1	0.528001	3.09647e-28
NUP35	PTOV1-AS1	0.411692	9.87216e-17
NUP37	PTOV1-AS1	0.524397	8.26801e-28
NUP43	PTOV1-AS1	0.517819	4.82076e-27
NUP54	PTOV1-AS1	0.418338	2.81409e-17
NUP62	PTOV1-AS1	0.68164	2.0452e-52
NUP85	PTOV1-AS1	0.561531	1.84307e-32
NUP93	PTOV1-AS1	0.568614	2.04261e-33
PKM	PTOV1-AS1	0.503809	1.81677e-25
PPP2R1A	PTOV1-AS1	0.493046	2.64048e-24
RAE1	PTOV1-AS1	0.45607	1.30584e-20
SEH1L	PTOV1-AS1	0.449849	4.9493e-20
TPR	PTOV1-AS1	0.428705	3.75491e-18
NUP43	AC005726.3	0.479121	7.34356e-23
NUP62	AC005726.3	0.403794	4.23212e-16
POM121	AL450326.1	0.454252	1.93287e-20
AAAS	AC010719.1	0.438234	5.54011e-19
NUP107	AC132872.3	0.438143	5.64449e-19
NUP85	AC132872.3	0.441656	2.74583e-19
ADPGK	AC007038.2	0.437595	6.31042e-19
GNPDA2	AC007038.2	0.43694	7.20988e-19
NUP107	AC007038.2	0.401324	6.62046e-16
NUP35	AC007038.2	0.473729	2.55595e-22
NUP43	AC007038.2	0.414481	5.84968e-17
NUP62	AC007038.2	0.407742	2.0544e-16
PKM	AC007038.2	0.416632	3.89377e-17
NUP85	AL512598.1	0.433113	1.56086e-18
PFKFB1	AC004832.5	0.501214	3.49448e-25
NUP85	LINC02315	0.436861	7.32598e-19
BPGM	AC000123.1	0.449132	5.76077e-20
NUP107	AC000123.1	0.427359	4.89563e-18
NUP205	AC000123.1	0.482352	3.44091e-23
POM121	AC000123.1	0.420515	1.85402e-17
POM121C	AC000123.1	0.417612	3.23158e-17
RANBP2	AC000123.1	0.407292	2.2319e-16
AAAS	KCNMB2-AS1	0.418719	2.61654e-17
NUP37	KCNMB2-AS1	0.418706	2.62281e-17
NUP85	KCNMB2-AS1	0.43545	9.75068e-19
TPI1	KCNMB2-AS1	0.432461	1.77881e-18
ENO2	LINC01667	0.405349	3.18728e-16
ALDOA	TMEM220-AS1	-0.47183	3.94486e-22
ALDOB	AC092071.1	0.449797	5.00389e-20
AAAS	AC009506.1	0.40165	6.2424e-16
NUP153	C2-AS1	0.423088	1.12788e-17
PGP	AC109322.1	0.720482	4.17667e-61
TPI1	AC109322.1	0.474949	1.93107e-22
AAAS	SNHG21	0.524792	7.42974e-28
ADPGK	SNHG21	0.462177	3.43822e-21
GNPDA2	SNHG21	0.427409	4.84807e-18
NUP107	SNHG21	0.513028	1.69952e-26
NUP35	SNHG21	0.449087	5.815e-20
NUP37	SNHG21	0.51107	2.82793e-26
NUP62	SNHG21	0.46376	2.42213e-21
NUP85	SNHG21	0.490984	4.36294e-24
NUP93	SNHG21	0.516909	6.13287e-27
PKM	SNHG21	0.454279	1.92167e-20
RAE1	SNHG21	0.51953	3.05846e-27
SEC13	SNHG21	0.409854	1.39003e-16
ALDOA	MIR210HG	0.502229	2.70701e-25
ENO1	MIR210HG	0.487352	1.04769e-23
ENO2	MIR210HG	0.499795	4.98474e-25
GAPDH	MIR210HG	0.486098	1.41431e-23
PFKFB4	MIR210HG	0.659811	4.2294e-48
TPI1	MIR210HG	0.542437	5.36723e-30
AAAS	AC010761.1	0.461873	3.67686e-21
NUP107	AC010761.1	0.475128	1.85325e-22
NUP188	AC010761.1	0.429089	3.47998e-18
NUP210	AC010761.1	0.403667	4.33153e-16
NUP37	AC010761.1	0.429115	3.46245e-18
NUP43	AC010761.1	0.466741	1.2459e-21
NUP62	AC010761.1	0.40146	6.46026e-16
NUP85	AC010761.1	0.488412	8.12195e-24
NUP93	AC010761.1	0.416787	3.78132e-17
AAAS	AC084033.3	0.552296	3.00014e-31
NUP107	AC084033.3	0.436225	8.33607e-19
NUP37	AC084033.3	0.551199	4.15495e-31
NUP43	AC084033.3	0.417041	3.6026e-17
NUP85	AC084033.3	0.509466	4.28209e-26
NUP93	AC084033.3	0.441534	2.81543e-19
SEC13	AC084033.3	0.431039	2.36276e-18
BPGM	NNT-AS1	0.434538	1.1722e-18
NUP155	NNT-AS1	0.482011	3.72827e-23
NUP58	NNT-AS1	0.425182	7.50214e-18
PFKFB3	NNT-AS1	0.51017	3.57045e-26
PFKP	NNT-AS1	0.541475	7.07505e-30
RANBP2	NNT-AS1	0.403135	4.77071e-16
TPR	NNT-AS1	0.471484	4.26894e-22
GNPDA2	NORAD	0.433333	1.49344e-18
NUP133	NORAD	0.46242	3.25815e-21
NUP153	NORAD	0.491591	3.76461e-24
NUP155	NORAD	0.454393	1.87516e-20
NUP160	NORAD	0.465341	1.70374e-21
NUP205	NORAD	0.423744	9.92902e-18
NUP214	NORAD	0.411112	1.1e-16
NUP54	NORAD	0.45697	1.07465e-20
NUP62	NORAD	0.401952	5.9112e-16
POM121	NORAD	0.476367	1.39239e-22
POM121C	NORAD	0.457607	9.35779e-21
RANBP2	NORAD	0.547953	1.08163e-30
TPR	NORAD	0.552961	2.46126e-31
AAAS	AL035461.2	0.536967	2.55262e-29
NUP107	AL035461.2	0.481059	4.66487e-23
NUP188	AL035461.2	0.458926	7.01952e-21
NUP210	AL035461.2	0.406846	2.42257e-16
NUP37	AL035461.2	0.459504	6.18634e-21
NUP43	AL035461.2	0.530042	1.76589e-28
NUP62	AL035461.2	0.464292	2.15182e-21
NUP85	AL035461.2	0.527098	3.96465e-28
NUP93	AL035461.2	0.50949	4.25531e-26
PKM	AL035461.2	0.424572	8.45063e-18
PPP2R1A	AL035461.2	0.400265	8.01134e-16
RAE1	AL035461.2	0.568115	2.38942e-33
SEC13	AL035461.2	0.42071	1.78564e-17
ALDOB	LINC01558	0.410087	1.33123e-16
AAAS	SNHG12	0.487287	1.06424e-23
ALDOA	SNHG12	0.511253	2.6969e-26
GNPDA1	SNHG12	0.417847	3.0905e-17
NUP107	SNHG12	0.429227	3.38642e-18
NUP188	SNHG12	0.407193	2.27288e-16
NUP43	SNHG12	0.434954	1.07781e-18
NUP62	SNHG12	0.401285	6.66767e-16
NUP85	SNHG12	0.428043	4.27859e-18
NUP93	SNHG12	0.510138	3.59962e-26
PKM	SNHG12	0.518396	4.13605e-27
PPP2R1A	SNHG12	0.43538	9.88975e-19
NUP43	LINC01138	0.420274	1.94204e-17
NUP62	LINC01138	0.412417	8.62075e-17
NUP85	LINC01138	0.474319	2.23213e-22
NUP43	AL117336.3	0.400012	8.38391e-16
SEH1L	UBR5-AS1	0.461081	4.37676e-21
AAAS	AL391244.3	0.431629	2.10044e-18
NUP43	AL391244.3	0.422253	1.32598e-17
ALDOB	DHRS4-AS1	0.461668	3.84673e-21
GCK	DHRS4-AS1	0.409278	1.54683e-16
PGP	AL121899.1	0.420841	1.74134e-17
AAAS	AL354892.2	0.467211	1.12132e-21
NUP107	AL354892.2	0.404388	3.79856e-16
NUP37	AL354892.2	0.471311	4.43946e-22
NUP43	AL354892.2	0.4522	3.00081e-20
NUP85	AL354892.2	0.434133	1.27164e-18
NUP43	MYLK-AS1	0.424973	7.81499e-18
NUP85	MYLK-AS1	0.45422	1.94626e-20
NUP93	MYLK-AS1	0.446085	1.09363e-19
PGP	MYLK-AS1	0.450695	4.13549e-20
ALDOB	AC005920.4	0.412988	7.74533e-17
AAAS	AC087741.1	0.443753	1.77848e-19
NUP85	AC087741.1	0.490832	4.52609e-24
BPGM	PAXIP1-AS2	0.40028	7.98995e-16
NUP153	PAXIP1-AS2	0.472216	3.61304e-22
NUP160	PAXIP1-AS2	0.413727	6.7417e-17
NUP205	PAXIP1-AS2	0.436421	8.00998e-19
NUP98	PAXIP1-AS2	0.46609	1.44116e-21
POM121	PAXIP1-AS2	0.577683	1.12952e-34
RANBP2	PAXIP1-AS2	0.46555	1.62613e-21
ADPGK	HLA-DQB1-AS1	0.426341	5.98032e-18
HK3	HLA-DQB1-AS1	0.431986	1.95609e-18
AAAS	AL035071.1	0.438425	5.32873e-19
NUP188	AL035071.1	0.415821	4.54137e-17
NUP43	AL035071.1	0.481836	3.88523e-23
NUP62	AL035071.1	0.448817	6.15669e-20
NUP93	AL035071.1	0.44353	1.86312e-19
PPP2R1A	AL035071.1	0.442383	2.36265e-19
RAE1	AL035071.1	0.462302	3.3441e-21
AAAS	SNHG3	0.466333	1.36497e-21
ENO1	SNHG3	0.453548	2.24877e-20
GNPDA1	SNHG3	0.420563	1.83715e-17
NUP107	SNHG3	0.45357	2.23814e-20
NUP37	SNHG3	0.471745	4.02206e-22
NUP43	SNHG3	0.400444	7.75728e-16
NUP62	SNHG3	0.430374	2.69728e-18
NUP85	SNHG3	0.488655	7.66047e-24
NUP93	SNHG3	0.479618	6.538e-23
PKM	SNHG3	0.448533	6.53713e-20
RAE1	SNHG3	0.450293	4.50417e-20
GCK	AL360181.1	0.428023	4.29538e-18
PFKFB1	AL360181.1	0.48361	2.55552e-23
PKLR	AL360181.1	0.405891	2.88676e-16
ALDOB	AP000695.1	0.474482	2.15035e-22
PGP	AL355472.1	0.448931	6.01028e-20
NUP85	AC087741.2	0.498835	6.33257e-25
PGP	AC087741.2	0.47688	1.23641e-22
PFKFB1	HNF4A-AS1	0.512485	1.95791e-26
AAAS	AC010973.2	0.415009	5.29522e-17
ALDOA	AC010973.2	0.423306	1.08111e-17
GNPDA1	AC010973.2	0.458252	8.13201e-21
PPP2R1A	AC005261.3	0.495664	1.38928e-24
ALDOB	AL161740.1	0.402741	5.12392e-16
ALDOA	MIR4435-2HG	0.470282	5.60897e-22
PGP	MIR4435-2HG	0.490891	4.46204e-24
PKM	MIR4435-2HG	0.419079	2.44208e-17
PPP2R1A	MIR4435-2HG	0.418995	2.48199e-17
RANBP2	AC015922.2	0.405645	3.01957e-16
ALDOA	AC015908.3	-0.409015	1.62402e-16
ENO3	AC015908.3	0.409605	1.45588e-16
AAAS	LINC01089	0.402057	5.79916e-16
PGP	LINC01089	0.43829	5.4768e-19
POM121	AC087481.3	0.404606	3.65051e-16
PGP	AC103706.1	0.436426	8.00216e-19
NUP153	AC093110.1	0.420399	1.8959e-17
NUP58	AC093110.1	0.403029	4.86351e-16
POM121	AC093110.1	0.470656	5.15188e-22
RANBP2	AC093110.1	0.51263	1.88521e-26
TPR	AC093110.1	0.43981	4.0138e-19
AAAS	AL031186.1	0.411469	1.02918e-16
ADPGK	AL031186.1	0.435738	9.19919e-19
NUP107	AL031186.1	0.456436	1.2065e-20
NUP43	AL031186.1	0.428389	3.99663e-18
NUP50	AL031186.1	0.437577	6.33402e-19
NUP62	AL031186.1	0.435911	8.88293e-19
BPGM	AL359752.1	0.431029	2.36768e-18
NUP93	AC060766.4	0.401768	6.1106e-16
PKM	AC060766.4	0.53136	1.22614e-28
PGP	AL441992.1	0.508135	6.02981e-26
ADPGK	AC005332.4	0.472812	3.15331e-22
NUP107	AC005332.4	0.456651	1.15167e-20
NUP37	AC005332.4	0.427108	5.14429e-18
NUP62	AC005332.4	0.443077	2.04643e-19
NUP85	AC005332.4	0.449758	5.04504e-20
NUP93	AC005332.4	0.492171	3.26931e-24
NUP35	AC016747.1	0.400566	7.58938e-16
NUP37	AC016747.1	0.443082	2.04436e-19
PFKP	AC016747.1	0.483646	2.53401e-23
PGP	AC015982.1	0.42596	6.44342e-18
PGP	AC009065.8	0.475334	1.76744e-22
PPP2R1A	PDCD4-AS1	0.442039	2.53689e-19
PFKFB1	AP001783.1	0.442271	2.41826e-19
NUP155	ASB16-AS1	0.491537	3.81457e-24
NUP85	ASB16-AS1	0.449743	5.06091e-20
TPR	ASB16-AS1	0.409826	1.39732e-16
PFKP	AC136475.2	0.419575	2.22097e-17
PGP	TP53TG1	0.43927	4.48322e-19
GNPDA2	LINC00342	0.476228	1.43774e-22
PFKFB3	LINC00342	0.540304	9.8917e-30
PFKP	LINC00342	0.417282	3.44154e-17
PKM	LINC00342	0.456519	1.18486e-20
RANBP2	LINC00342	0.410777	1.17091e-16
NUP153	TRAM2-AS1	0.440271	3.65128e-19
PPP2R5D	TRAM2-AS1	0.507421	7.24287e-26
PGP	AL355353.1	0.630914	6.49421e-43
TPI1	AL355353.1	0.443605	1.8343e-19
PGP	AC023090.1	0.497005	9.97428e-25
PGP	PRR34-AS1	0.504702	1.44877e-25
NUP85	SCAMP1-AS1	0.402092	5.76334e-16
PGP	AC046143.2	0.470546	5.28222e-22
PPP2R1A	AC046143.2	0.421782	1.45243e-17
NUP153	AL354733.3	0.504011	1.72608e-25
NUP160	AL354733.3	0.486189	1.38384e-23
NUP214	AL354733.3	0.445208	1.31369e-19
NUP58	AL354733.3	0.430074	2.86272e-18
NUP98	AL354733.3	0.415239	5.07019e-17
POM121	AL354733.3	0.537415	2.24938e-29
RANBP2	AL354733.3	0.485741	1.53995e-23
TPR	AL354733.3	0.510373	3.38771e-26
PKM	HOTAIRM1	0.434541	1.17145e-18
PPP2R1A	HOTAIRM1	0.466457	1.32762e-21
AAAS	AC095057.3	0.421978	1.39835e-17
TPI1	AC093673.1	0.422688	1.21875e-17
RAE1	SNHG11	0.430897	2.43068e-18
PGP	AC027644.3	0.670955	2.94532e-50
TPI1	AC027644.3	0.41823	2.87285e-17
NUP133	ZNF667-AS1	0.400716	7.38674e-16
NUP58	AC013275.1	0.432088	1.91661e-18
PFKFB3	AC013275.1	0.448191	7.02672e-20
AAAS	AL136295.7	0.40109	6.9063e-16
PGP	LINC02490	0.42734	4.91486e-18
NUP153	U91328.1	0.524667	7.68519e-28
PPP2R5D	U91328.1	0.583574	1.64013e-35
ALDOB	LINC02362	0.401699	6.18738e-16
PGP	AC105446.1	0.695109	2.84959e-55
PGP	AC026979.2	0.699717	2.76091e-56
TPI1	AC026979.2	0.430392	2.68757e-18
NUP35	AC009237.14	0.457662	9.24527e-21
PFKFB3	AC010547.2	0.54228	5.61572e-30
PFKM	AC010547.2	0.488778	7.43638e-24
PFKP	AC010547.2	0.567201	3.18131e-33
AAAS	MAFG-DT	0.45492	1.67395e-20
NUP37	MAFG-DT	0.441184	3.02598e-19
NUP85	MAFG-DT	0.409907	1.37646e-16
PGP	MAFG-DT	0.528583	2.63891e-28
TPI1	MAFG-DT	0.410424	1.2503e-16
NUP205	AC068580.1	0.416232	4.20133e-17
NUP58	AC068580.1	0.410233	1.29551e-16
POM121	AC068580.1	0.458997	6.9111e-21
AAAS	AC020765.2	0.414833	5.47364e-17
PGP	AC020765.2	0.521155	1.98121e-27
ALDOA	CD27-AS1	0.520876	2.13488e-27
PFKFB3	CD27-AS1	0.508469	5.53395e-26
PFKM	CD27-AS1	0.440633	3.38975e-19
PFKP	CD27-AS1	0.51908	3.44804e-27
PKM	CD27-AS1	0.516853	6.22432e-27
PPP2R1A	CD27-AS1	0.448696	6.31595e-20
TPI1	CD27-AS1	0.408009	1.95578e-16
AAAS	NOP14-AS1	0.445598	1.2108e-19
ALDOA	NOP14-AS1	0.42003	2.03527e-17
GNPDA2	AC024075.1	0.417617	3.229e-17
NUP153	AC024075.1	0.46248	3.21573e-21
NUP160	AC024075.1	0.45184	3.24066e-20
NUP205	AC024075.1	0.406511	2.57655e-16
NUP58	AC024075.1	0.405041	3.37184e-16
NUP98	AC024075.1	0.408663	1.73328e-16
POM121	AC024075.1	0.616738	1.45086e-40
POM121C	AC024075.1	0.458386	7.89728e-21
RANBP2	AC024075.1	0.509495	4.2497e-26
TPR	AC024075.1	0.465582	1.61456e-21
PGP	PARD3-AS1	0.429123	3.45631e-18
AAAS	SNHG7	0.438482	5.2663e-19
RAE1	SNHG7	0.488401	8.14236e-24
AAAS	PTOV1-AS2	0.431526	2.14401e-18
NUP107	PTOV1-AS2	0.539275	1.32658e-29
NUP188	PTOV1-AS2	0.505197	1.27766e-25
NUP210	PTOV1-AS2	0.416456	4.02592e-17
NUP214	PTOV1-AS2	0.449532	5.29246e-20
NUP43	PTOV1-AS2	0.484043	2.30651e-23
NUP50	PTOV1-AS2	0.417477	3.31595e-17
NUP62	PTOV1-AS2	0.505683	1.12895e-25
NUP85	PTOV1-AS2	0.410482	1.23696e-16
TPR	PTOV1-AS2	0.430676	2.53964e-18
PGP	AC009275.1	0.646157	1.40255e-45
PRKACA	AC007099.1	0.425572	6.95151e-18
PGP	AP003068.1	0.723535	7.50235e-62
ALDOA	TMEM161B-AS1	0.403678	4.32263e-16
NUP214	AC011700.1	0.412514	8.46539e-17
AAAS	AP001505.1	0.404943	3.43262e-16
PGP	AP001505.1	0.487583	9.91289e-24
PPP2R1A	AP001505.1	0.4527	2.69671e-20
TPI1	AP001505.1	0.41829	2.84013e-17
ADPGK	AC115618.2	0.405588	3.05123e-16
RANBP2	AC115618.2	0.405875	2.89505e-16
PGP	CAMTA1-DT	0.403499	4.46527e-16
PKLR	ADORA2A-AS1	0.455972	1.33394e-20
HK3	LINC01857	0.412302	8.80867e-17
NUP205	TNFRSF10A-AS1	0.401209	6.75975e-16
PPP2CB	TNFRSF10A-AS1	0.564487	7.4079e-33
RANBP2	TNFRSF10A-AS1	0.491943	3.45556e-24
ADPGK	AC010542.5	0.400933	7.10396e-16
ALDOA	CYTOR	0.460706	4.75318e-21
PGP	CYTOR	0.567347	3.0393e-33
PPP2R1A	CYTOR	0.400654	7.46925e-16
TPI1	CYTOR	0.451131	3.76951e-20
GNPDA2	CTBP1-DT	0.469748	6.32967e-22
NDC1	CTBP1-DT	0.406608	2.5308e-16
NUP107	CTBP1-DT	0.428279	4.08391e-18
NUP133	CTBP1-DT	0.448714	6.29184e-20
NUP153	CTBP1-DT	0.538442	1.68098e-29
NUP155	CTBP1-DT	0.496154	1.231e-24
NUP160	CTBP1-DT	0.531222	1.27392e-28
NUP205	CTBP1-DT	0.495432	1.47066e-24
NUP214	CTBP1-DT	0.472383	3.47778e-22
NUP54	CTBP1-DT	0.507401	7.27872e-26
NUP98	CTBP1-DT	0.493757	2.21899e-24
POM121	CTBP1-DT	0.528949	2.38623e-28
POM121C	CTBP1-DT	0.542896	4.70206e-30
PPP2R5D	CTBP1-DT	0.474856	1.97309e-22
RANBP2	CTBP1-DT	0.408197	1.88882e-16
TPR	CTBP1-DT	0.54194	6.192e-30
PPP2CB	AC100810.1	0.40761	2.10506e-16
AAAS	SNHG10	0.508283	5.80498e-26
NUP107	SNHG10	0.440044	3.82555e-19
NUP37	SNHG10	0.434897	1.09034e-18
NUP85	SNHG10	0.41221	8.96147e-17
RAE1	SNHG10	0.431994	1.95292e-18
AAAS	AL359504.2	0.437847	5.99557e-19
NUP107	AL359504.2	0.456249	1.25634e-20
ADPGK	AC016888.1	0.415231	5.07766e-17
NUP85	AC016888.1	0.41975	2.14771e-17
POM121	AC016888.1	0.405454	3.12659e-16
PGP	AC016405.3	0.617678	1.02228e-40
TPI1	AC016405.3	0.444136	1.64257e-19
ALDOA	AC147651.1	0.409935	1.36941e-16
PFKFB3	AC147651.1	0.656833	1.53902e-47
PFKP	AC147651.1	0.707378	5.152e-58
PKM	AC147651.1	0.416571	3.93938e-17
GNPDA2	AL122010.1	0.417156	3.52511e-17
BPGM	LINC00997	0.428125	4.21052e-18
PFKFB3	LINC00997	0.409851	1.39075e-16
PKM	LINC00997	0.408885	1.66357e-16
AAAS	AC068473.5	0.445411	1.25913e-19
NUP85	AC068473.5	0.466507	1.31301e-21
GNPDA2	AL390728.6	0.406506	2.57848e-16
NUP107	AL390728.6	0.442533	2.29037e-19
NUP35	AL390728.6	0.418895	2.5299e-17
NUP43	AL390728.6	0.492454	3.05118e-24
TPR	AL390728.6	0.412923	7.8404e-17
NUP133	AC093297.2	0.406311	2.67264e-16
RANBP2	AC093297.2	0.415172	5.13442e-17
TPR	AC093297.2	0.435054	1.05631e-18
PGP	KMT2E-AS1	0.649825	3.03778e-46
TPI1	KMT2E-AS1	0.423183	1.10735e-17
NUP160	AC090589.3	0.411559	1.01208e-16
NUP98	AC090589.3	0.428064	4.26123e-18
POM121	AC090589.3	0.428964	3.56693e-18
RANBP2	AC090589.3	0.425918	6.49634e-18
TPR	AC090589.3	0.437175	6.87382e-19
AAAS	AC002398.1	0.521591	1.76209e-27
ALDOA	AC002398.1	0.502056	2.82782e-25
NUP37	AC002398.1	0.403993	4.08233e-16
NUP43	AC002398.1	0.439971	3.88293e-19
NUP85	AC002398.1	0.418898	2.52826e-17
NUP93	AC002398.1	0.451253	3.67273e-20
PKM	AC002398.1	0.460219	5.28934e-21
PPP2R1A	AC002398.1	0.540922	8.28989e-30
RAE1	AC002398.1	0.403662	4.33508e-16
PFKFB1	AC004832.4	0.411316	1.05897e-16
AAAS	AC125257.1	0.41823	2.87236e-17
NDC1	AC125257.1	0.403888	4.16074e-16
NUP107	AC125257.1	0.461435	4.04893e-21
NUP133	AC125257.1	0.405378	3.17083e-16
NUP155	AC125257.1	0.43234	1.82237e-18
NUP188	AC125257.1	0.431196	2.29017e-18
NUP214	AC125257.1	0.437104	6.97358e-19
NUP35	AC125257.1	0.454894	1.68355e-20
NUP43	AC125257.1	0.491918	3.47643e-24
NUP62	AC125257.1	0.438421	5.33264e-19
NUP85	AC125257.1	0.439571	4.21554e-19
POM121C	AC125257.1	0.449437	5.40042e-20
PPP2R5D	AC125257.1	0.402734	5.13031e-16
SEH1L	AC125257.1	0.438267	5.50289e-19
TPR	AC125257.1	0.491762	3.61164e-24
GCK	AC005180.2	0.409798	1.4045e-16
PKLR	AC005180.2	0.498992	6.0897e-25
PGP	AC007773.1	0.708895	2.30685e-58
TPI1	AC007773.1	0.432518	1.75863e-18
PGP	LINC01023	0.492386	3.10201e-24
ALDOA	LINC02298	0.517498	5.24868e-27
PFKFB3	LINC02298	0.505153	1.29197e-25
PFKP	LINC02298	0.573238	4.72122e-34
PKM	LINC02298	0.447106	8.8278e-20
PPP2R1A	LINC02298	0.516873	6.19242e-27
NUP153	AL137003.2	0.423676	1.00623e-17
AAAS	AC007405.3	0.419189	2.39143e-17
NUP37	AC007405.3	0.450278	4.51846e-20
SEC13	AC007405.3	0.403443	4.51121e-16
ALDOB	LINC02428	0.460377	5.10889e-21
PGP	AC008608.2	0.673619	8.70211e-51
PPP2R1A	FLJ20021	0.411511	1.02107e-16
ALDOB	AC243836.1	0.503586	1.92236e-25
GCK	AC243836.1	0.453613	2.21728e-20
AAAS	AL050341.2	0.514635	1.11612e-26
GNPDA2	AL050341.2	0.447944	7.40102e-20
NDC1	AL050341.2	0.507176	7.71008e-26
NUP107	AL050341.2	0.53551	3.84883e-29
NUP155	AL050341.2	0.433767	1.36882e-18
NUP188	AL050341.2	0.406786	2.44955e-16
NUP214	AL050341.2	0.486094	1.4158e-23
NUP37	AL050341.2	0.470294	5.5937e-22
NUP43	AL050341.2	0.422163	1.3491e-17
NUP54	AL050341.2	0.409329	1.53226e-16
NUP85	AL050341.2	0.519898	2.77286e-27
PPP2R1A	AC040977.1	0.427836	4.45698e-18
HK1	AC026369.2	0.412559	8.395e-17
PGP	AP002748.3	0.518395	4.13718e-27
GCK	AC010280.2	0.532121	9.92611e-29
PKLR	AC010280.2	0.411329	1.05643e-16
PFKFB1	AL161668.4	0.473566	2.65341e-22
PFKFB3	UCA1	0.413543	6.97899e-17
PFKP	UCA1	0.464833	1.90815e-21
PGP	AC008443.4	0.658904	6.27948e-48
PPP2R1A	AL158152.2	0.40262	5.23762e-16
AAAS	BX537318.1	0.444484	1.5277e-19
GNPDA2	AL355102.4	0.416158	4.26075e-17
PFKFB3	AL355102.4	0.495264	1.53306e-24
PFKP	AL355102.4	0.459719	5.90173e-21
RAE1	AL355102.4	0.420858	1.7355e-17
ADPGK	THAP9-AS1	0.446477	1.00733e-19
GNPDA2	THAP9-AS1	0.518572	3.94726e-27
NUP35	THAP9-AS1	0.431281	2.25174e-18
NUP54	THAP9-AS1	0.538996	1.43613e-29
NUP58	THAP9-AS1	0.407745	2.05331e-16
PFKFB3	THAP9-AS1	0.474161	2.31495e-22
PFKM	THAP9-AS1	0.421172	1.63364e-17
PFKP	THAP9-AS1	0.410499	1.23309e-16
PKM	THAP9-AS1	0.467986	9.42025e-22
RANBP2	THAP9-AS1	0.429724	3.06866e-18
PGP	AL391056.1	0.654032	5.11725e-47
NUP43	AP000240.1	0.402414	5.43724e-16
POM121	AC018647.2	0.421023	1.68133e-17
PGP	AC010883.1	0.409766	1.41281e-16
GNPDA2	EBLN3P	0.486571	1.26307e-23
NUP107	EBLN3P	0.447581	7.99023e-20
NUP133	EBLN3P	0.457687	9.1955e-21
NUP153	EBLN3P	0.579277	6.7253e-35
NUP155	EBLN3P	0.400194	8.11385e-16
NUP160	EBLN3P	0.568468	2.13866e-33
NUP188	EBLN3P	0.408544	1.77168e-16
NUP205	EBLN3P	0.497209	9.48395e-25
NUP214	EBLN3P	0.525811	5.63141e-28
NUP54	EBLN3P	0.521393	1.85844e-27
NUP58	EBLN3P	0.55256	2.77393e-31
NUP98	EBLN3P	0.562893	1.21241e-32
POM121	EBLN3P	0.556313	9.01276e-32
POM121C	EBLN3P	0.412061	9.2142e-17
PPP2CB	EBLN3P	0.409245	1.55617e-16
PRKACB	EBLN3P	0.4459	1.13683e-19
RANBP2	EBLN3P	0.611397	1.03742e-39
TPR	EBLN3P	0.559891	3.04398e-32
ADPGK	AL359076.1	0.514089	1.28794e-26
NUP85	JPX	0.407926	1.98586e-16
AAAS	AC004816.1	0.543045	4.50486e-30
ENO1	AC004816.1	0.479413	6.85834e-23
NDC1	AC004816.1	0.488012	8.94195e-24
NUP107	AC004816.1	0.49385	2.16895e-24
NUP188	AC004816.1	0.505702	1.12344e-25
NUP35	AC004816.1	0.40901	1.62556e-16
NUP37	AC004816.1	0.599701	6.77862e-38
NUP43	AC004816.1	0.481148	4.56806e-23
NUP62	AC004816.1	0.421435	1.55298e-17
NUP85	AC004816.1	0.465311	1.71517e-21
NUP93	AC004816.1	0.566496	3.96609e-33
PFKFB4	AC004816.1	0.43605	8.63658e-19
RAE1	AC004816.1	0.430355	2.70729e-18
SEC13	AC004816.1	0.466352	1.35928e-21
TPI1	AC004816.1	0.427688	4.58934e-18
PPP2R1A	AP000757.2	0.417257	3.45788e-17
PGP	TRIM52-AS1	0.585762	7.92877e-36
TPI1	TRIM52-AS1	0.412029	9.26904e-17
PGP	AP002360.1	0.671754	2.04578e-50
TPI1	AP002360.1	0.497209	9.48265e-25
GNPDA2	AC004656.1	0.4575	9.57679e-21
NUP188	AC004656.1	0.411203	1.08157e-16
AAAS	AC142472.1	0.414807	5.50127e-17
NUP85	AC142472.1	0.442148	2.48041e-19
PGP	AC142472.1	0.4798	6.26524e-23
ADPGK	LINC00294	0.610746	1.31498e-39
BPGM	LINC00294	0.438175	5.60753e-19
GNPDA2	LINC00294	0.457775	9.02117e-21
NUP107	LINC00294	0.486382	1.32156e-23
NUP160	LINC00294	0.433555	1.42831e-18
NUP188	LINC00294	0.457322	9.95436e-21
NUP205	LINC00294	0.473398	2.75758e-22
NUP35	LINC00294	0.41294	7.81558e-17
NUP43	LINC00294	0.447334	8.41599e-20
NUP54	LINC00294	0.401054	6.95007e-16
NUP62	LINC00294	0.441489	2.84158e-19
NUP85	LINC00294	0.422067	1.37453e-17
NUP93	LINC00294	0.446806	9.40259e-20
NUP98	LINC00294	0.431792	2.03316e-18
PKM	LINC00294	0.42606	6.31868e-18
GNPDA2	AC093227.1	0.45899	6.92236e-21
NUP107	AC093227.1	0.567358	3.02963e-33
NUP133	AC093227.1	0.557419	6.45215e-32
NUP153	AC093227.1	0.464163	2.21478e-21
NUP155	AC093227.1	0.411547	1.01425e-16
NUP160	AC093227.1	0.533835	6.15672e-29
NUP188	AC093227.1	0.443499	1.8751e-19
NUP205	AC093227.1	0.424195	9.09608e-18
NUP214	AC093227.1	0.51468	1.10307e-26
NUP35	AC093227.1	0.456675	1.14558e-20
NUP43	AC093227.1	0.449564	5.25684e-20
NUP54	AC093227.1	0.465866	1.51542e-21
NUP62	AC093227.1	0.404283	3.87175e-16
NUP98	AC093227.1	0.452959	2.55125e-20
RAE1	AC093227.1	0.469122	7.29231e-22
RANBP2	AC093227.1	0.459217	6.58677e-21
TPR	AC093227.1	0.578106	9.84707e-35
ALDOA	ITGB1-DT	0.48755	9.99156e-24
PFKFB3	ITGB1-DT	0.681215	2.50192e-52
PFKP	ITGB1-DT	0.721562	2.28124e-61
PKM	ITGB1-DT	0.402276	5.57473e-16
PGP	AC009171.2	0.540323	9.83852e-30
ALDOA	AC124798.1	0.569461	1.5647e-33
GNPDA1	AC124798.1	0.401492	6.42294e-16
GPI	AC124798.1	0.466832	1.22079e-21
PFKM	AC124798.1	0.427206	5.04606e-18
PFKP	AC124798.1	0.428645	3.79948e-18
PKM	AC124798.1	0.446241	1.05848e-19
PGP	AC008915.2	0.589685	2.12491e-36
TPI1	AC008915.2	0.460376	5.11044e-21
NUP37	AL359513.1	0.419332	2.32677e-17
ALDOA	AC069281.2	0.428311	4.0583e-18
PGP	AC069281.2	0.58029	4.8313e-35
PPP2R1A	AC069281.2	0.418398	2.78195e-17
TPI1	AC069281.2	0.413055	7.64836e-17
ADPGK	AL035446.1	0.584576	1.17647e-35
NUP93	AL035446.1	0.443586	1.84139e-19
AAAS	NRAV	0.429078	3.48765e-18
ALDOA	NRAV	0.676948	1.86074e-51
ENO1	NRAV	0.41102	1.11895e-16
ENO2	NRAV	0.405654	3.01436e-16
GNPDA1	NRAV	0.488846	7.31523e-24
GNPDA2	NRAV	0.475426	1.7301e-22
NDC1	NRAV	0.535464	3.89871e-29
NUP107	NRAV	0.492002	3.40625e-24
NUP155	NRAV	0.465258	1.73567e-21
NUP188	NRAV	0.429991	2.91053e-18
NUP205	NRAV	0.497207	9.48834e-25
NUP35	NRAV	0.46096	4.49498e-21
NUP37	NRAV	0.490094	5.41205e-24
NUP43	NRAV	0.431473	2.16715e-18
NUP54	NRAV	0.423814	9.79565e-18
NUP62	NRAV	0.523245	1.12898e-27
NUP85	NRAV	0.428188	4.15807e-18
NUP93	NRAV	0.484384	2.12701e-23
PFKFB3	NRAV	0.609326	2.20245e-39
PFKP	NRAV	0.56606	4.54266e-33
PKM	NRAV	0.573177	4.8135e-34
PPP2CA	NRAV	0.418809	2.57149e-17
PPP2R1A	NRAV	0.507774	6.61487e-26
RAE1	NRAV	0.434733	1.12703e-18
TPI1	NRAV	0.436077	8.58922e-19
PPP2R1B	AP001781.1	0.55306	2.38987e-31
GCK	AC104031.1	0.420766	1.7665e-17
ALDOA	AP000424.1	0.413226	7.40728e-17
PFKP	AP000424.1	0.450418	4.38586e-20
NUP153	USP46-AS1	0.403202	4.71302e-16
NUP160	USP46-AS1	0.454654	1.773e-20
NUP54	USP46-AS1	0.457764	9.0432e-21
PGP	SNHG9	0.634939	1.32784e-43
ALDOA	AP001453.2	0.55274	2.62907e-31
GAPDH	AP001453.2	0.487034	1.13055e-23
PGP	AP001453.2	0.521308	1.90151e-27
TPI1	AP001453.2	0.454193	1.95768e-20
PGP	AL121832.2	0.652996	7.95466e-47
TPI1	AL121832.2	0.471094	4.66448e-22
NUP153	AL137003.1	0.526178	5.09689e-28
POM121	AL137003.1	0.410358	1.26572e-16
ALDOA	RBPMS-AS1	0.410291	1.28165e-16
PFKFB3	RBPMS-AS1	0.544248	3.18249e-30
PFKP	RBPMS-AS1	0.680384	3.70912e-52
PGP	SNHG6	0.620825	3.13844e-41
TPI1	SNHG6	0.448158	7.07555e-20
NUP153	AL391121.1	0.405061	3.35995e-16
POM121	AL391121.1	0.502713	2.39625e-25
POM121C	AL391121.1	0.404205	3.92748e-16
RANBP2	AL391121.1	0.401488	6.42697e-16
PGP	ELF3-AS1	0.436214	8.35464e-19
PGP	AP004609.3	0.420581	1.83068e-17
PGP	MINCR	0.665668	3.19332e-49
RAE1	GAS5	0.455402	1.50871e-20
NUP43	AC010326.3	0.469128	7.28177e-22
NUP62	AC010326.3	0.486141	1.39991e-23
PPP2R1A	AC010326.3	0.428285	4.07914e-18
PGP	AC002467.1	0.410779	1.1705e-16
PGP	SNHG19	0.719404	7.61785e-61
TPI1	SNHG19	0.492923	2.72105e-24
NUP153	OIP5-AS1	0.501323	3.40006e-25
NUP160	OIP5-AS1	0.458174	8.27099e-21
NUP50	OIP5-AS1	0.408532	1.7758e-16
NUP54	OIP5-AS1	0.446688	9.63899e-20
NUP98	OIP5-AS1	0.44715	8.74775e-20
POM121	OIP5-AS1	0.516353	7.10332e-27
RANBP2	OIP5-AS1	0.570017	1.31292e-33
TPR	OIP5-AS1	0.500085	4.63657e-25
PFKFB1	AC099508.2	0.401398	6.53229e-16
NUP88	LRRC75A-AS1	0.484086	2.28317e-23
RAE1	LRRC75A-AS1	0.517941	4.66695e-27
PFKFB3	AC016735.1	0.402777	5.09046e-16
PPP2R1A	AC016735.1	0.405062	3.35913e-16
PGP	AC025181.2	0.453944	2.06554e-20
GNPDA2	AC022150.2	0.500631	4.044e-25
NUP133	AC022150.2	0.488656	7.65933e-24
NUP160	AC022150.2	0.42248	1.26893e-17
NUP214	AC022150.2	0.427537	4.72792e-18
NUP98	AC022150.2	0.404679	3.60247e-16
PFKFB3	AC022150.2	0.417111	3.55541e-17
RANBP2	AC022150.2	0.436139	8.48206e-19
TPR	AC022150.2	0.510302	3.44996e-26
NUP107	C8orf49	0.46472	1.95649e-21
NUP155	C8orf49	0.426685	5.58989e-18
NUP188	C8orf49	0.496262	1.19856e-24
NUP205	C8orf49	0.486901	1.16732e-23
NUP214	C8orf49	0.488266	8.41185e-24
AAAS	AC145207.5	0.452282	2.94871e-20
NDC1	AC145207.5	0.406398	2.63014e-16
NUP107	AC145207.5	0.469455	6.76283e-22
NUP188	AC145207.5	0.449377	5.46915e-20
NUP37	AC145207.5	0.416452	4.02922e-17
NUP43	AC145207.5	0.469206	7.15431e-22
NUP62	AC145207.5	0.487456	1.02182e-23
NUP85	AC145207.5	0.581646	3.09742e-35
RAE1	AC145207.5	0.432021	1.94245e-18
AAAS	AC092171.5	0.404491	3.72796e-16
GNPDA2	AC005261.1	0.418126	2.93011e-17
NUP43	AC005261.1	0.429567	3.16535e-18
NUP62	AC005261.1	0.540433	9.53536e-30
PKM	AC005261.1	0.422142	1.35461e-17
PPP2R1A	AC005261.1	0.52877	2.50704e-28
HK3	PCED1B-AS1	0.544065	3.35562e-30
PGP	AL353194.1	0.477701	1.02207e-22
ALDOA	AC020916.1	0.409506	1.48285e-16
PKM	AC020916.1	0.523971	9.27999e-28
PFKFB3	AC005696.1	0.501083	3.61096e-25
PFKM	AC005696.1	0.519446	3.12825e-27
PFKP	AC005696.1	0.609245	2.26754e-39
ALDOA	LINC02041	0.46884	7.77171e-22
PFKFB3	LINC02041	0.426429	5.87702e-18
PFKP	LINC02041	0.467179	1.12922e-21
AAAS	RNASEH1-AS1	0.451719	3.32545e-20
NUP37	RNASEH1-AS1	0.498646	6.63801e-25
PGP	RPARP-AS1	0.406776	2.4542e-16
NUP43	AL080317.1	0.526276	4.96171e-28
AAAS	ZNF503-AS2	0.434384	1.20904e-18
GNPDA2	AC012467.2	0.413092	7.596e-17
NDC1	AC012467.2	0.418849	2.5521e-17
NUP107	AC012467.2	0.498646	6.63778e-25
NUP160	AC012467.2	0.43211	1.90826e-18
NUP188	AC012467.2	0.468513	8.36648e-22
NUP210	AC012467.2	0.422137	1.35603e-17
NUP214	AC012467.2	0.424668	8.29501e-18
SEH1L	AC012467.2	0.428456	3.94391e-18
TPR	AC012467.2	0.434876	1.09487e-18
ADPGK	AC005288.1	0.46316	2.76655e-21
BPGM	AC005288.1	0.466608	1.28361e-21
GNPDA2	AC005288.1	0.555699	1.08435e-31
NDC1	AC005288.1	0.539496	1.24563e-29
NUP107	AC005288.1	0.55593	1.0115e-31
NUP133	AC005288.1	0.508008	6.23002e-26
NUP153	AC005288.1	0.66435	5.74066e-49
NUP155	AC005288.1	0.59402	4.8541e-37
NUP160	AC005288.1	0.653868	5.48794e-47
NUP188	AC005288.1	0.496057	1.26088e-24
NUP205	AC005288.1	0.640713	1.30672e-44
NUP210	AC005288.1	0.402988	4.9e-16
NUP214	AC005288.1	0.518558	3.96193e-27
NUP35	AC005288.1	0.428048	4.27501e-18
NUP43	AC005288.1	0.434548	1.16982e-18
NUP50	AC005288.1	0.449688	5.12057e-20
NUP54	AC005288.1	0.625012	6.38647e-42
NUP58	AC005288.1	0.615628	2.19061e-40
NUP62	AC005288.1	0.461989	3.58384e-21
NUP98	AC005288.1	0.623488	1.14337e-41
PFKFB3	AC005288.1	0.481762	3.95385e-23
PGAM1	AC005288.1	0.441634	2.75791e-19
POM121	AC005288.1	0.645199	2.08367e-45
POM121C	AC005288.1	0.561042	2.14115e-32
PPP2R5D	AC005288.1	0.436026	8.67801e-19
PRKACB	AC005288.1	0.505137	1.29705e-25
RANBP2	AC005288.1	0.692473	1.0619e-54
SEH1L	AC005288.1	0.420815	1.75008e-17
TPR	AC005288.1	0.693952	5.0837e-55
AAAS	NCK1-DT	0.400972	7.0544e-16
ENO1	NCK1-DT	0.435486	9.67963e-19
GNPDA1	NCK1-DT	0.436901	7.26724e-19
NDC1	NCK1-DT	0.444859	1.41302e-19
NUP107	NCK1-DT	0.474788	2.00406e-22
NUP35	NCK1-DT	0.403523	4.44655e-16
NUP37	NCK1-DT	0.570945	9.78835e-34
NUP85	NCK1-DT	0.473957	2.42547e-22
NUP93	NCK1-DT	0.465236	1.74391e-21
PPP2CA	NCK1-DT	0.406773	2.45524e-16
SEC13	NCK1-DT	0.440246	3.6703e-19
SEH1L	NCK1-DT	0.422665	1.22415e-17
PGP	AL391832.2	0.474939	1.93581e-22
GNPDA1	AL139260.1	0.55761	6.09053e-32
BPGM	AC004918.3	0.403582	4.39898e-16
AAAS	AC083880.1	0.472086	3.72155e-22
PGP	ELFN1-AS1	0.604093	1.4397e-38
PGP	AC009065.4	0.797275	1.43624e-83
TPI1	AC009065.4	0.411977	9.36006e-17
PFKP	AC009414.2	0.40158	6.32138e-16
ENO2	AC079305.1	0.401567	6.33587e-16
HK2	AC079305.1	0.435867	8.96288e-19
NUP58	AC079305.1	0.415972	4.41336e-17
PGAM1	AC079305.1	0.40087	7.18451e-16
PPP2R1A	AL049840.4	0.468748	7.93431e-22
PGP	AC138696.2	0.423968	9.50606e-18
AAAS	AC132192.2	0.461765	3.76514e-21
NUP85	AC132192.2	0.40509	3.34207e-16
AAAS	MAPKAPK5-AS1	0.605326	9.27859e-39
ALDOA	MAPKAPK5-AS1	0.601233	3.95972e-38
GAPDH	MAPKAPK5-AS1	0.466736	1.24727e-21
NUP37	MAPKAPK5-AS1	0.499903	4.85199e-25
NUP85	MAPKAPK5-AS1	0.449338	5.51519e-20
NUP93	MAPKAPK5-AS1	0.434464	1.18979e-18
PGP	MAPKAPK5-AS1	0.584091	1.38205e-35
PKM	MAPKAPK5-AS1	0.448178	7.04509e-20
PPP2R1A	MAPKAPK5-AS1	0.597381	1.52207e-37
RAE1	MAPKAPK5-AS1	0.447	9.02786e-20
TPI1	MAPKAPK5-AS1	0.542798	4.83724e-30
ADPGK	AC009237.15	0.507862	6.46834e-26
BPGM	AC009237.15	0.403626	4.364e-16
PKM	AC009237.15	0.426932	5.32484e-18
NUP107	AC115619.1	-0.422538	1.25477e-17
NUP153	AC115619.1	-0.404375	3.80735e-16
NUP155	AC115619.1	-0.403394	4.55205e-16
NUP188	AC115619.1	-0.405082	3.34671e-16
NUP205	AC115619.1	-0.447451	8.21131e-20
NUP98	AC115619.1	-0.402959	4.92569e-16
PPP2R5D	AC115619.1	-0.430218	2.78181e-18
GNPDA2	PSMA3-AS1	0.404692	3.59406e-16
NUP133	PSMA3-AS1	0.434472	1.18777e-18
NUP160	PSMA3-AS1	0.427846	4.44802e-18
NUP35	PSMA3-AS1	0.436411	8.02646e-19
NUP54	PSMA3-AS1	0.449713	5.09407e-20
RANBP2	PSMA3-AS1	0.449263	5.60288e-20
TPR	PSMA3-AS1	0.474423	2.17967e-22
ENO1	PRRT3-AS1	0.459693	5.93628e-21
PGP	PRRT3-AS1	0.478659	8.17795e-23
PGP	AC090912.2	0.439358	4.40296e-19
PFKFB3	AC004540.2	0.626952	3.02921e-42
PFKP	AC004540.2	0.635092	1.24979e-43
BPGM	LINC01278	0.405777	2.94727e-16
GNPDA2	LINC01278	0.40024	8.0476e-16
NUP133	LINC01278	0.519036	3.48881e-27
NUP153	LINC01278	0.474501	2.14103e-22
NUP155	LINC01278	0.436992	7.13367e-19
NUP160	LINC01278	0.449128	5.76459e-20
NUP205	LINC01278	0.49129	4.0503e-24
NUP214	LINC01278	0.443564	1.84994e-19
NUP98	LINC01278	0.442965	2.09457e-19
PGK1	LINC01278	0.447291	8.49167e-20
POM121	LINC01278	0.426625	5.65613e-18
POM121C	LINC01278	0.422328	1.30689e-17
PRKACB	LINC01278	0.408542	1.77251e-16
RANBP2	LINC01278	0.433865	1.3422e-18
TPR	LINC01278	0.50543	1.20392e-25
AAAS	ARRDC1-AS1	0.5309	1.39276e-28
ALDOA	ARRDC1-AS1	0.448303	6.86303e-20
NUP188	ARRDC1-AS1	0.455482	1.48302e-20
NUP214	ARRDC1-AS1	0.469416	6.82386e-22
NUP37	ARRDC1-AS1	0.427667	4.60842e-18
NUP85	ARRDC1-AS1	0.433233	1.5238e-18
PGP	ARRDC1-AS1	0.456614	1.16088e-20
TPI1	ARRDC1-AS1	0.432572	1.73973e-18
AAAS	THUMPD3-AS1	0.430749	2.5032e-18
NUP107	THUMPD3-AS1	0.449769	5.0336e-20
NUP210	THUMPD3-AS1	0.43972	4.08806e-19
NUP35	THUMPD3-AS1	0.431817	2.02314e-18
NUP37	THUMPD3-AS1	0.433275	1.51094e-18
NUP43	THUMPD3-AS1	0.526339	4.87742e-28
NUP62	THUMPD3-AS1	0.415382	4.93435e-17
NUP85	THUMPD3-AS1	0.424585	8.43053e-18
SEC13	THUMPD3-AS1	0.444719	1.45477e-19
AAAS	ZEB1-AS1	0.467164	1.13317e-21
GNPDA2	ZEB1-AS1	0.482007	3.73218e-23
NDC1	ZEB1-AS1	0.430766	2.49473e-18
NUP107	ZEB1-AS1	0.458529	7.65577e-21
NUP155	ZEB1-AS1	0.413348	7.24016e-17
NUP214	ZEB1-AS1	0.404735	3.56592e-16
NUP35	ZEB1-AS1	0.467965	9.46579e-22
NUP54	ZEB1-AS1	0.439589	4.2e-19
NUP62	ZEB1-AS1	0.42196	1.40334e-17
PFKFB3	ZEB1-AS1	0.471215	4.53789e-22
PFKP	ZEB1-AS1	0.540022	1.07236e-29
RANBP2	ZEB1-AS1	0.445666	1.1939e-19
PGP	YTHDF3-AS1	0.586044	7.21693e-36
PFKFB3	MIR3936HG	0.403839	4.19834e-16
PFKP	MIR3936HG	0.416118	4.29281e-17
AAAS	PXN-AS1	0.419915	2.08046e-17
NUP37	PXN-AS1	0.445772	1.16774e-19
NUP85	PXN-AS1	0.435415	9.81955e-19
PGP	PXN-AS1	0.57141	8.4479e-34
AAAS	ZFAS1	0.403942	4.11999e-16
ALDOA	ZFAS1	0.429161	3.43063e-18
PPP2R1A	ZFAS1	0.513658	1.4417e-26
RAE1	ZFAS1	0.451438	3.53097e-20
TPI1	ZFAS1	0.429166	3.4276e-18
NUP155	AC034231.1	0.408159	1.90235e-16
PGP	AC034231.1	0.435649	9.36536e-19
ALDOA	AGAP2-AS1	0.501478	3.2701e-25
GPI	AGAP2-AS1	0.431367	2.21327e-18
PKM	AGAP2-AS1	0.516103	7.58777e-27
PPP2R1A	AGAP2-AS1	0.585254	9.39149e-36
GNPDA2	AC008735.2	0.400369	7.86338e-16
NUP107	AC008735.2	0.498845	6.31723e-25
NUP43	AC008735.2	0.428591	3.8399e-18
NUP50	AC008735.2	0.418939	2.50834e-17
NUP62	AC008735.2	0.403012	4.8785e-16
RANBP2	AC008735.2	0.402102	5.75233e-16
TPR	AC008735.2	0.477926	9.69941e-23
NUP205	RAB11B-AS1	-0.464691	1.9694e-21
NUP98	RAB11B-AS1	-0.453391	2.32575e-20
PGP	AC245297.3	0.451366	3.58551e-20
PPP2R1A	AC090425.1	0.480409	5.43331e-23
PGP	AL355512.1	0.441185	3.02567e-19
AAAS	AL355488.1	0.414905	5.40043e-17
GNPDA2	AL355488.1	0.447922	7.436e-20
NDC1	AL355488.1	0.46413	2.23074e-21
NUP107	AL355488.1	0.524969	7.08133e-28
NUP35	AL355488.1	0.488119	8.71412e-24
NUP43	AL355488.1	0.462553	3.16431e-21
NUP62	AL355488.1	0.480058	5.89885e-23
NUP85	AL355488.1	0.438044	5.75873e-19
TPR	AL355488.1	0.411471	1.02881e-16
PFKFB1	LINC02453	0.410156	1.31417e-16
AAAS	AL109811.3	0.415224	5.08446e-17
POM121	AC002401.2	0.407154	2.28927e-16
AAAS	AC005332.5	0.431924	1.98061e-18
BPGM	AC005332.5	0.426795	5.47003e-18
GNPDA1	AC005332.5	0.401048	6.95862e-16
NUP107	AC005332.5	0.4395	4.27697e-19
NUP205	AC005332.5	0.425164	7.52907e-18
NUP62	AC005332.5	0.513268	1.59619e-26
NUP85	AC005332.5	0.507553	7.00203e-26
POM121C	AC005332.5	0.43253	1.75422e-18
PPP2R1A	AC011468.1	0.487793	9.42568e-24
ADPGK	LINC02035	0.408312	1.84946e-16
BPGM	LINC02035	0.466031	1.46028e-21
GNPDA2	LINC02035	0.567759	2.67126e-33
NUP160	LINC02035	0.453643	2.2033e-20
NUP205	LINC02035	0.423662	1.00895e-17
NUP214	LINC02035	0.492199	3.24697e-24
NUP54	LINC02035	0.49079	4.57285e-24
NUP58	LINC02035	0.42739	4.86624e-18
NUP62	LINC02035	0.428281	4.08236e-18
PFKFB3	LINC02035	0.573405	4.47484e-34
PFKM	LINC02035	0.471128	4.62903e-22
PFKP	LINC02035	0.501217	3.49133e-25
PKM	LINC02035	0.469662	6.45378e-22
RANBP2	LINC02035	0.526851	4.24198e-28
TPR	LINC02035	0.444397	1.55572e-19
PGP	AC005076.1	0.623528	1.12599e-41
TPI1	AC005076.1	0.476254	1.42924e-22
NDC1	FOXD2-AS1	0.460274	5.22623e-21
NUP62	FOXD2-AS1	0.452234	2.97923e-20
NUP85	FOXD2-AS1	0.469973	6.01535e-22
AAAS	SREBF2-AS1	0.460076	5.45764e-21
NUP37	SREBF2-AS1	0.404077	4.01992e-16
NUP43	SREBF2-AS1	0.477302	1.1211e-22
NUP50	SREBF2-AS1	0.482246	3.52745e-23
NUP62	SREBF2-AS1	0.467511	1.04814e-21
NUP85	SREBF2-AS1	0.461028	4.42813e-21
RAE1	SREBF2-AS1	0.439487	4.28869e-19
PGP	LINC00896	0.543387	4.08215e-30
PGP	AC073896.4	0.596408	2.13252e-37
PPP2R1A	AC073896.4	0.504186	1.65136e-25
ALDOA	AC008771.1	0.409533	1.47537e-16
PGP	AC008771.1	0.453575	2.23585e-20
NUP37	AC016394.1	0.410834	1.15851e-16
PFKFB3	AC104083.1	0.43992	3.92388e-19
AAAS	SNHG1	0.485145	1.77499e-23
GNPDA2	SNHG1	0.414891	5.41415e-17
NUP107	SNHG1	0.567723	2.70233e-33
NUP188	SNHG1	0.439237	4.51309e-19
NUP205	SNHG1	0.403095	4.80595e-16
NUP210	SNHG1	0.411865	9.55844e-17
NUP214	SNHG1	0.439803	4.01953e-19
NUP35	SNHG1	0.516605	6.64628e-27
NUP37	SNHG1	0.454545	1.81474e-20
NUP43	SNHG1	0.55272	2.64446e-31
NUP50	SNHG1	0.411362	1.0499e-16
NUP62	SNHG1	0.454733	1.74306e-20
NUP85	SNHG1	0.43018	2.80303e-18
NUP93	SNHG1	0.431915	1.98416e-18
RAE1	SNHG1	0.535776	3.57202e-29
SEH1L	SNHG1	0.498276	7.27839e-25
PGP	AC012146.1	0.567834	2.60981e-33
PGP	LINC01503	0.466491	1.31761e-21
NDC1	CCDC18-AS1	0.406721	2.47875e-16
NUP107	CCDC18-AS1	0.450378	4.42349e-20
AAAS	AL139287.1	0.405811	2.92914e-16
GNPDA2	AL139287.1	0.422113	1.36222e-17
NUP107	AL139287.1	0.435072	1.05235e-18
NUP188	AL139287.1	0.460724	4.73486e-21
NUP214	AL139287.1	0.412834	7.97264e-17
NUP43	AL139287.1	0.475141	1.84769e-22
NUP62	AL139287.1	0.415723	4.62674e-17
NUP85	AL139287.1	0.422115	1.36167e-17
NUP43	AL359921.2	0.427574	4.69271e-18
NUP62	AL359921.2	0.420817	1.74922e-17
AAAS	LINC00909	0.417082	3.57503e-17
ADPGK	LINC00909	0.47504	1.89096e-22
GNPDA2	LINC00909	0.455337	1.52995e-20
NDC1	LINC00909	0.478226	9.04556e-23
NUP107	LINC00909	0.577948	1.03627e-34
NUP133	LINC00909	0.401789	6.08691e-16
NUP153	LINC00909	0.401719	6.16453e-16
NUP155	LINC00909	0.500245	4.45386e-25
NUP160	LINC00909	0.524216	8.68536e-28
NUP188	LINC00909	0.448145	7.09489e-20
NUP205	LINC00909	0.469778	6.28652e-22
NUP214	LINC00909	0.494181	2.00006e-24
NUP35	LINC00909	0.469689	6.41533e-22
NUP37	LINC00909	0.440169	3.72849e-19
NUP54	LINC00909	0.564837	6.64463e-33
NUP58	LINC00909	0.411445	1.03376e-16
NUP85	LINC00909	0.459329	6.42801e-21
NUP93	LINC00909	0.407024	2.34481e-16
NUP98	LINC00909	0.479535	6.66585e-23
RANBP2	LINC00909	0.473258	2.84701e-22
SEH1L	LINC00909	0.418044	2.97631e-17
TPR	LINC00909	0.47366	2.59658e-22
ALDOA	AL354836.1	0.483171	2.83563e-23
GNPDA2	AL354836.1	0.447154	8.73938e-20
NUP93	AL354836.1	0.406661	2.50657e-16
PFKFB3	AL354836.1	0.477748	1.01095e-22
PFKM	AL354836.1	0.464598	2.01022e-21
PFKP	AL354836.1	0.408672	1.73034e-16
PKM	AL354836.1	0.522568	1.35508e-27
PPP2R1A	AL354836.1	0.453854	2.10553e-20
PGP	AC080013.6	0.446315	1.04231e-19
AAAS	AC099850.3	0.43888	4.85529e-19
ADPGK	AC099850.3	0.573122	4.89905e-34
ENO1	AC099850.3	0.472123	3.69018e-22
GNPDA1	AC099850.3	0.465696	1.57384e-21
GNPDA2	AC099850.3	0.488367	8.21045e-24
NDC1	AC099850.3	0.688166	8.83878e-54
NUP107	AC099850.3	0.754469	5.11228e-70
NUP153	AC099850.3	0.490407	5.01716e-24
NUP155	AC099850.3	0.712687	3.02297e-59
NUP160	AC099850.3	0.638986	2.62875e-44
NUP188	AC099850.3	0.732063	5.46561e-64
NUP205	AC099850.3	0.77937	1.56704e-77
NUP210	AC099850.3	0.618981	6.27968e-41
NUP214	AC099850.3	0.552325	2.97459e-31
NUP35	AC099850.3	0.479603	6.56073e-23
NUP37	AC099850.3	0.604285	1.34491e-38
NUP43	AC099850.3	0.605021	1.03451e-38
NUP50	AC099850.3	0.450869	3.98561e-20
NUP54	AC099850.3	0.590675	1.51945e-36
NUP58	AC099850.3	0.510677	3.13153e-26
NUP62	AC099850.3	0.60162	3.45438e-38
NUP85	AC099850.3	0.666126	2.60267e-49
NUP93	AC099850.3	0.656995	1.43542e-47
NUP98	AC099850.3	0.586358	6.498e-36
PFKFB4	AC099850.3	0.435789	9.10513e-19
PGAM1	AC099850.3	0.480564	5.23892e-23
PGK1	AC099850.3	0.460732	4.72621e-21
PKM	AC099850.3	0.487469	1.01871e-23
POM121	AC099850.3	0.431609	2.10916e-18
POM121C	AC099850.3	0.514839	1.05794e-26
PRKACB	AC099850.3	0.4136	6.90508e-17
RAE1	AC099850.3	0.435838	9.01546e-19
RANBP2	AC099850.3	0.424463	8.63277e-18
SEH1L	AC099850.3	0.567912	2.54629e-33
TPR	AC099850.3	0.556146	9.47757e-32
NUP85	CNNM3-DT	0.455751	1.39917e-20
ALDOB	FAM99B	0.447086	8.86504e-20
GCK	FAM99B	0.449078	5.82659e-20
NUP50	NUP50-DT	0.438836	4.89922e-19
NUP188	LINC01004	0.403188	4.72537e-16
NUP43	LINC01004	0.428028	4.29144e-18
GNPDA1	AL606489.1	0.407222	2.26091e-16
NDC1	AL606489.1	0.523838	9.61954e-28
NUP107	AL606489.1	0.49749	8.84631e-25
NUP153	AL606489.1	0.477333	1.11302e-22
NUP155	AL606489.1	0.561613	1.79746e-32
NUP160	AL606489.1	0.461527	3.968e-21
NUP188	AL606489.1	0.552023	3.25365e-31
NUP205	AL606489.1	0.538639	1.58989e-29
NUP210	AL606489.1	0.519785	2.85778e-27
NUP214	AL606489.1	0.500622	4.05336e-25
NUP43	AL606489.1	0.438311	5.45364e-19
NUP54	AL606489.1	0.446559	9.90188e-20
NUP58	AL606489.1	0.449563	5.25781e-20
NUP62	AL606489.1	0.43077	2.49286e-18
NUP85	AL606489.1	0.43475	1.12318e-18
NUP98	AL606489.1	0.50973	4.00012e-26
POM121	AL606489.1	0.455433	1.49882e-20
POM121C	AL606489.1	0.508866	4.99747e-26
TPR	AL606489.1	0.614721	3.06349e-40
PGP	LINC02062	0.54124	7.56784e-30
ALDOA	AC007996.1	0.587047	5.16162e-36
PFKFB3	AC007996.1	0.411338	1.05457e-16
PFKP	AC007996.1	0.414705	5.60816e-17
PKM	AC007996.1	0.476554	1.33329e-22
NUP85	AL139384.1	0.428847	3.65099e-18
ALDOA	SPINT1-AS1	0.420884	1.72685e-17
PFKFB3	SPINT1-AS1	0.499824	4.94881e-25
PFKP	SPINT1-AS1	0.517723	4.94519e-27
PKM	SPINT1-AS1	0.444509	1.51983e-19
PPP2R1A	SPINT1-AS1	0.501896	2.94386e-25
NUP85	AC139530.1	0.541158	7.74879e-30
PGP	AC139530.1	0.630235	8.46918e-43
TPI1	AC139530.1	0.401317	6.62827e-16
ENO1	ZFPM2-AS1	0.463715	2.4463e-21
PGP	AL391069.2	0.454614	1.78801e-20
PGP	AL023803.1	0.468644	8.12238e-22
ALDOB	LINC01018	0.434711	1.13189e-18
PFKFB1	LINC01018	0.550025	5.87975e-31
ALDOA	GPRC5D-AS1	0.42016	1.98484e-17
NUP37	GPRC5D-AS1	0.411504	1.02253e-16
PPP2R1A	GPRC5D-AS1	0.499009	6.06456e-25
TPI1	GPRC5D-AS1	0.458736	7.31699e-21
AAAS	WAC-AS1	0.538061	1.87296e-29
GNPDA2	WAC-AS1	0.481446	4.25934e-23
NUP107	WAC-AS1	0.490286	5.16705e-24
NUP133	WAC-AS1	0.439365	4.3968e-19
NUP155	WAC-AS1	0.436952	7.19148e-19
NUP214	WAC-AS1	0.45267	2.71408e-20
NUP35	WAC-AS1	0.453511	2.26642e-20
NUP37	WAC-AS1	0.481898	3.82903e-23
NUP43	WAC-AS1	0.411128	1.09679e-16
NUP54	WAC-AS1	0.417219	3.48266e-17
NUP62	WAC-AS1	0.424875	7.96647e-18
NUP85	WAC-AS1	0.458463	7.76648e-21
PFKFB3	WAC-AS1	0.459201	6.60996e-21
PFKP	WAC-AS1	0.459858	5.72559e-21
PPP2R5D	WAC-AS1	0.413801	6.64892e-17
RAE1	WAC-AS1	0.433798	1.36051e-18
TPR	WAC-AS1	0.484767	1.94222e-23
AAAS	ZNF213-AS1	0.439175	4.5709e-19
NUP85	ZNF213-AS1	0.441262	2.97777e-19
PGP	ZSCAN16-AS1	0.421469	1.54264e-17
POM121C	AC073335.2	0.426114	6.25208e-18
AAAS	LINC00665	0.458278	8.08494e-21
GNPDA2	LINC00665	0.466182	1.41196e-21
NDC1	LINC00665	0.406979	2.3641e-16
NUP107	LINC00665	0.52506	6.90825e-28
NUP133	LINC00665	0.421661	1.48663e-17
NUP188	LINC00665	0.452168	3.02132e-20
NUP205	LINC00665	0.400996	7.02342e-16
NUP214	LINC00665	0.472711	3.22693e-22
NUP35	LINC00665	0.423394	1.06274e-17
NUP37	LINC00665	0.481385	4.3207e-23
NUP43	LINC00665	0.450715	4.11768e-20
NUP62	LINC00665	0.423966	9.50979e-18
NUP93	LINC00665	0.416295	4.15105e-17
RAE1	LINC00665	0.536643	2.79735e-29
TPR	LINC00665	0.410146	1.31656e-16
NUP58	AC021078.1	0.409826	1.39721e-16
RANBP2	AC021078.1	0.506751	8.5962e-26
TPR	AC021078.1	0.421027	1.68016e-17
PGP	AC147651.3	0.582784	2.12942e-35
AAAS	LENG8-AS1	0.43048	2.64098e-18
ADPGK	LENG8-AS1	0.419498	2.25381e-17
GNPDA2	LENG8-AS1	0.453095	2.47807e-20
NDC1	LENG8-AS1	0.403387	4.55744e-16
NUP107	LENG8-AS1	0.511406	2.59199e-26
NUP155	LENG8-AS1	0.418546	2.70432e-17
NUP214	LENG8-AS1	0.491874	3.51456e-24
NUP35	LENG8-AS1	0.493297	2.48353e-24
NUP43	LENG8-AS1	0.430885	2.43617e-18
NUP62	LENG8-AS1	0.47566	1.63943e-22
NUP85	LENG8-AS1	0.420154	1.98741e-17
RANBP2	LENG8-AS1	0.472694	3.23901e-22
TPR	LENG8-AS1	0.480426	5.41155e-23
ALDOA	AC023043.4	0.444646	1.47713e-19
PKM	AC023043.4	0.40157	6.33346e-16
TPI1	AC023043.4	0.430251	2.76381e-18
PFKFB1	AC012313.9	0.411898	9.49873e-17
PFKFB3	BX322562.1	0.422532	1.25622e-17
PPP2R1A	BX322562.1	0.500287	4.40785e-25
ADPGK	AC011451.1	0.456774	1.12122e-20
GNPDA2	AC011451.1	0.470079	5.87324e-22
HK1	AC011451.1	0.435394	9.86091e-19
NUP107	AC011451.1	0.460029	5.51497e-21
PKM	AC011451.1	0.409164	1.57978e-16
NUP43	AC120053.1	0.432551	1.7469e-18
PPP2R1A	AC120053.1	0.403308	4.62322e-16
BPGM	AC005034.3	0.412706	8.16659e-17
GNPDA2	AC005034.3	0.452077	3.08101e-20
NUP133	AC005034.3	0.400144	8.18713e-16
NUP35	AC005034.3	0.432547	1.74851e-18
PFKP	AC005034.3	0.424747	8.1683e-18
RANBP2	AC005034.3	0.45395	2.06255e-20
TPR	AC005034.3	0.407199	2.27027e-16
NUP107	AL365330.1	0.420137	1.99373e-17
NUP43	AL365330.1	0.418131	2.92748e-17
PGP	AC015912.3	0.777433	6.52146e-77
TPI1	AC015912.3	0.446981	9.06368e-20
PGP	AC010331.1	0.405439	3.13573e-16
AAAS	ZNF674-AS1	0.425869	6.55893e-18
NUP107	ZNF674-AS1	0.479772	6.30682e-23
NUP35	ZNF674-AS1	0.404973	3.41432e-16
NUP62	ZNF674-AS1	0.405167	3.29501e-16
NUP85	ZNF674-AS1	0.451828	3.24901e-20
RAE1	ZNF674-AS1	0.418775	2.5883e-17
PGP	CH17-340M24.3	0.57404	3.65255e-34
ALDOA	NRSN2-AS1	0.613929	4.10174e-40
BPGM	NRSN2-AS1	0.411598	1.00472e-16
ENO1	NRSN2-AS1	0.40014	8.19284e-16
GNPDA1	NRSN2-AS1	0.414678	5.63588e-17
GNPDA2	NRSN2-AS1	0.607719	3.93495e-39
GPI	NRSN2-AS1	0.423347	1.07251e-17
NDC1	NRSN2-AS1	0.44926	5.6062e-20
NUP107	NRSN2-AS1	0.440399	3.55683e-19
NUP155	NRSN2-AS1	0.428826	3.66567e-18
NUP188	NRSN2-AS1	0.426765	5.50246e-18
NUP205	NRSN2-AS1	0.438772	4.9639e-19
NUP93	NRSN2-AS1	0.462719	3.04984e-21
PFKFB3	NRSN2-AS1	0.558019	5.38061e-32
PFKM	NRSN2-AS1	0.636602	6.84639e-44
PFKP	NRSN2-AS1	0.581523	3.22465e-35
PGAM1	NRSN2-AS1	0.408695	1.72283e-16
PGK1	NRSN2-AS1	0.440451	3.51873e-19
PKM	NRSN2-AS1	0.513439	1.52664e-26
PPP2R1A	NRSN2-AS1	0.417117	3.55093e-17
NUP160	AC012313.1	0.408996	1.62952e-16
NUP205	AC012313.1	0.400347	7.89398e-16
NUP214	AC012313.1	0.426921	5.33673e-18
POM121	AC012313.1	0.444956	1.38454e-19
POM121C	AC012313.1	0.415392	4.92562e-17
BPGM	FAM111A-DT	0.50023	4.4712e-25
GNPDA2	FAM111A-DT	0.541327	7.38249e-30
NDC1	FAM111A-DT	0.451087	3.8045e-20
NUP107	FAM111A-DT	0.439604	4.18692e-19
NUP155	FAM111A-DT	0.477402	1.09549e-22
NUP160	FAM111A-DT	0.438505	5.24168e-19
NUP205	FAM111A-DT	0.490446	4.97027e-24
NUP43	FAM111A-DT	0.421188	1.62869e-17
NUP54	FAM111A-DT	0.529104	2.2871e-28
NUP58	FAM111A-DT	0.485253	1.73e-23
NUP62	FAM111A-DT	0.407072	2.32405e-16
NUP85	FAM111A-DT	0.419041	2.45993e-17
NUP98	FAM111A-DT	0.496074	1.25557e-24
PFKFB3	FAM111A-DT	0.554395	1.6037e-31
PFKP	FAM111A-DT	0.505482	1.18816e-25
PKM	FAM111A-DT	0.44435	1.57104e-19
POM121C	FAM111A-DT	0.429038	3.51496e-18
PPP2CA	FAM111A-DT	0.441854	2.63574e-19
RANBP2	FAM111A-DT	0.48661	1.25139e-23
SEH1L	FAM111A-DT	0.414576	5.74561e-17
TPR	FAM111A-DT	0.454614	1.7882e-20
NUP153	AC005586.1	0.489896	5.67782e-24
NUP160	AC005586.1	0.414011	6.39076e-17
NUP205	AC005586.1	0.444817	1.42529e-19
POM121	AC005586.1	0.598288	1.11002e-37
POM121C	AC005586.1	0.540697	8.84185e-30
TPR	AC005586.1	0.418732	2.60979e-17
PFKFB1	AC144652.1	0.461042	4.41441e-21
ALDOB	CR936218.2	0.410166	1.31177e-16
AAAS	TMPO-AS1	0.424964	7.82833e-18
NUP107	TMPO-AS1	0.478882	7.76323e-23
NUP155	TMPO-AS1	0.469233	7.11081e-22
NUP210	TMPO-AS1	0.449741	5.06307e-20
NUP43	TMPO-AS1	0.455786	1.38855e-20
NUP85	TMPO-AS1	0.493572	2.32184e-24
PPP2R1A	F11-AS1	-0.402217	5.63427e-16
NUP107	AC084018.1	0.437465	6.48039e-19
POM121	AC084018.1	0.414582	5.73889e-17
TPR	AC084018.1	0.420209	1.96649e-17
ADPGK	FGD5-AS1	0.436915	7.24649e-19
GNPDA2	FGD5-AS1	0.490896	4.45697e-24
NDC1	FGD5-AS1	0.492384	3.10348e-24
NUP107	FGD5-AS1	0.529001	2.3523e-28
NUP133	FGD5-AS1	0.417502	3.30047e-17
NUP153	FGD5-AS1	0.608447	3.02656e-39
NUP155	FGD5-AS1	0.531501	1.1793e-28
NUP160	FGD5-AS1	0.67024	4.07855e-50
NUP188	FGD5-AS1	0.442663	2.22956e-19
NUP205	FGD5-AS1	0.562261	1.47287e-32
NUP210	FGD5-AS1	0.456679	1.14471e-20
NUP214	FGD5-AS1	0.500359	4.32909e-25
NUP35	FGD5-AS1	0.41823	2.87281e-17
NUP54	FGD5-AS1	0.568941	1.84323e-33
NUP58	FGD5-AS1	0.504808	1.41011e-25
NUP62	FGD5-AS1	0.43565	9.36491e-19
NUP98	FGD5-AS1	0.602914	2.18724e-38
POM121	FGD5-AS1	0.588777	2.88658e-36
POM121C	FGD5-AS1	0.513858	1.36832e-26
PRKACB	FGD5-AS1	0.435391	9.86819e-19
RANBP2	FGD5-AS1	0.568314	2.24457e-33
SEH1L	FGD5-AS1	0.402847	5.02696e-16
TPR	FGD5-AS1	0.609241	2.27124e-39
NUP85	LINC01268	0.416105	4.30381e-17
ALDOA	LINC00957	0.454636	1.77968e-20
PFKFB3	LINC00957	0.447768	7.6819e-20
PFKM	LINC00957	0.430845	2.45575e-18
PFKP	LINC00957	0.562522	1.35929e-32
PPP2R1A	LINC00957	0.427548	4.71743e-18
AAAS	AC073611.1	0.428427	3.96676e-18
ALDOA	AC073611.1	0.462388	3.28176e-21
GAPDH	AC073611.1	0.420886	1.72629e-17
HK3	AC073611.1	0.402142	5.71135e-16
NUP37	AC073611.1	0.419035	2.46292e-17
NUP93	AC073611.1	0.475128	1.85326e-22
PGP	AC073611.1	0.403158	4.75106e-16
PKM	AC073611.1	0.426782	5.484e-18
PPP2R1A	AC073611.1	0.429124	3.45617e-18
TPI1	AC073611.1	0.4155	4.82543e-17
PGP	AC131009.3	0.68538	3.41328e-53
AAAS	AC026401.3	0.532758	8.31553e-29
ADPGK	AC026401.3	0.464947	1.86024e-21
ALDOA	AC026401.3	0.43979	4.02986e-19
ENO1	AC026401.3	0.477678	1.02736e-22
GAPDH	AC026401.3	0.408425	1.81123e-16
GNPDA1	AC026401.3	0.466306	1.37338e-21
NDC1	AC026401.3	0.41892	2.51769e-17
NUP107	AC026401.3	0.465753	1.5539e-21
NUP188	AC026401.3	0.539143	1.37745e-29
NUP210	AC026401.3	0.501152	3.54865e-25
NUP37	AC026401.3	0.547953	1.08168e-30
NUP43	AC026401.3	0.538165	1.8188e-29
NUP62	AC026401.3	0.489632	6.05264e-24
NUP85	AC026401.3	0.571022	9.55392e-34
NUP93	AC026401.3	0.552096	3.18452e-31
PFKFB4	AC026401.3	0.402187	5.66489e-16
PGP	AC026401.3	0.467401	1.07444e-21
PKM	AC026401.3	0.462563	3.15673e-21
PPP2R1A	AC026401.3	0.40354	4.43231e-16
SEC13	AC026401.3	0.470906	4.86808e-22
TPI1	AC026401.3	0.476496	1.3514e-22
AAAS	AC064836.3	0.449151	5.73706e-20
PGP	SNHG25	0.594099	4.72518e-37
ALDOA	SBF2-AS1	0.522293	1.45933e-27
NDC1	SBF2-AS1	0.430206	2.78866e-18
NUP107	SBF2-AS1	0.447901	7.46857e-20
NUP155	SBF2-AS1	0.443838	1.74747e-19
NUP205	SBF2-AS1	0.449077	5.82819e-20
NUP35	SBF2-AS1	0.420027	2.03628e-17
NUP37	SBF2-AS1	0.413626	6.87165e-17
NUP54	SBF2-AS1	0.437853	5.98712e-19
NUP85	SBF2-AS1	0.497228	9.43891e-25
PFKFB3	SBF2-AS1	0.501666	3.119e-25
PFKP	SBF2-AS1	0.545887	1.97752e-30
PKM	SBF2-AS1	0.421112	1.65261e-17
PPP2CA	SBF2-AS1	0.426696	5.57706e-18
NUP153	AC073569.2	0.405062	3.35901e-16
PFKFB3	AC073569.2	0.404884	3.47019e-16
POM121	AC073569.2	0.448391	6.73582e-20
RANBP2	AC073569.2	0.524481	8.08248e-28
ADPGK	AC018904.1	0.460306	5.18901e-21
BPGM	AC018904.1	0.489559	6.1596e-24
GNPDA2	AC018904.1	0.423551	1.03084e-17
NUP62	AC018904.1	0.487991	8.98738e-24
PKM	AC018904.1	0.481392	4.31382e-23
AAAS	LINC02001	0.498472	6.93198e-25
NUP85	LINC02001	0.556829	7.71319e-32
PGP	LINC02001	0.426603	5.68049e-18
RAE1	LINC02001	0.417038	3.60501e-17
SEC13	LINC02001	0.422261	1.32389e-17
AAAS	BACE1-AS	0.453405	2.31853e-20
GNPDA1	BACE1-AS	0.409133	1.58868e-16
GNPDA2	BACE1-AS	0.406176	2.73945e-16
NUP107	BACE1-AS	0.485848	1.50109e-23
NUP188	BACE1-AS	0.429089	3.48006e-18
NUP214	BACE1-AS	0.476003	1.51444e-22
NUP37	BACE1-AS	0.410367	1.26364e-16
NUP43	BACE1-AS	0.551755	3.52364e-31
NUP62	BACE1-AS	0.506427	9.33887e-26
RAE1	BACE1-AS	0.463293	2.68621e-21
SEH1L	BACE1-AS	0.454002	2.03986e-20
AAAS	AC127024.5	0.415503	4.8229e-17
NUP107	AC127024.5	0.476606	1.31741e-22
NUP133	AC127024.5	0.418627	2.66305e-17
NUP188	AC127024.5	0.403284	4.64313e-16
NUP210	AC127024.5	0.433053	1.57974e-18
NUP214	AC127024.5	0.453417	2.31274e-20
NUP35	AC127024.5	0.472175	3.64684e-22
NUP43	AC127024.5	0.540594	9.1063e-30
NUP62	AC127024.5	0.465159	1.77415e-21
NUP85	AC127024.5	0.45024	4.55484e-20
RAE1	AC127024.5	0.422487	1.26722e-17
TPR	AC127024.5	0.429492	3.21323e-18
NUP153	SNHG16	0.412634	8.27724e-17
NUP85	SNHG16	0.480488	5.33302e-23
POM121C	SNHG16	0.436767	7.46702e-19
AAAS	AC009779.2	0.498209	7.39932e-25
ENO1	AC009779.2	0.434928	1.08344e-18
GNPDA1	AC009779.2	0.468682	8.05319e-22
NUP107	AC009779.2	0.424756	8.15289e-18
NUP37	AC009779.2	0.472564	3.33701e-22
PFKFB4	AC009779.2	0.401925	5.93948e-16
ALDOB	SPATA41	0.427133	5.11835e-18
ENO1	PIK3CD-AS2	0.415144	5.16144e-17
ADPGK	AC007406.5	0.448361	6.77856e-20
GNPDA2	AC007406.5	0.516611	6.63499e-27
NDC1	AC007406.5	0.417631	3.22015e-17
NUP107	AC007406.5	0.533187	7.37688e-29
NUP133	AC007406.5	0.535209	4.1887e-29
NUP153	AC007406.5	0.569607	1.49426e-33
NUP155	AC007406.5	0.457187	1.02517e-20
NUP160	AC007406.5	0.663455	8.53473e-49
NUP188	AC007406.5	0.476928	1.22285e-22
NUP205	AC007406.5	0.503891	1.77955e-25
NUP214	AC007406.5	0.579143	7.02696e-35
NUP35	AC007406.5	0.451609	3.40436e-20
NUP37	AC007406.5	0.410511	1.23024e-16
NUP54	AC007406.5	0.603338	1.88252e-38
NUP58	AC007406.5	0.489316	6.5325e-24
NUP62	AC007406.5	0.434349	1.2177e-18
NUP98	AC007406.5	0.520971	2.08105e-27
POM121	AC007406.5	0.52409	8.98651e-28
POM121C	AC007406.5	0.508746	5.15392e-26
RANBP2	AC007406.5	0.628381	1.7428e-42
SEH1L	AC007406.5	0.41743	3.34559e-17
TPR	AC007406.5	0.622028	1.99134e-41
AAAS	MELTF-AS1	0.419163	2.40309e-17
NUP210	MELTF-AS1	0.456959	1.07704e-20
NUP43	MELTF-AS1	0.455325	1.53409e-20
NUP85	MELTF-AS1	0.421034	1.6779e-17
PPP2R1A	MELTF-AS1	0.41746	3.32674e-17
GNPDA2	LINC01836	0.438494	5.25387e-19
PFKFB3	LINC01836	0.629559	1.10237e-42
PFKM	LINC01836	0.467129	1.14206e-21
PFKP	LINC01836	0.61106	1.17311e-39
GCK	SLC6A1-AS1	0.437984	5.82966e-19
AAAS	AL118516.1	0.479135	7.31833e-23
NUP85	AL118516.1	0.41574	4.61187e-17
HK3	LINC01871	0.406049	2.80405e-16
PGP	AP002387.1	0.485282	1.71806e-23
GCK	AL445222.1	0.451282	3.64992e-20
AAAS	AC020915.3	0.410542	1.22322e-16
NUP37	AC020915.3	0.433344	1.49029e-18
NUP62	AC020915.3	0.535176	4.22824e-29
NUP85	AC020915.3	0.408491	1.78917e-16
NUP93	AC020915.3	0.409134	1.58867e-16
PPP2R1A	AC020915.3	0.545184	2.42621e-30
RAE1	AC020915.3	0.40747	2.16008e-16
PGP	AC009686.2	0.694578	3.71794e-55
PFKP	AC008736.1	0.405233	3.25595e-16
PGP	AC117498.2	0.402387	5.46319e-16
AAAS	AC048341.2	0.44497	1.3805e-19
ADPGK	AC048341.2	0.478467	8.55152e-23
ALDOA	AC048341.2	0.439498	4.27906e-19
NUP93	AC048341.2	0.419459	2.27081e-17
PKM	AC048341.2	0.601944	3.08152e-38
PPP2R1A	AC048341.2	0.420318	1.92577e-17
NUP153	AL132989.1	0.427298	4.95563e-18
NUP160	AL132989.1	0.433789	1.36289e-18
NUP54	AL132989.1	0.403327	4.60753e-16
NUP58	AL132989.1	0.433471	1.45264e-18
NUP98	AL132989.1	0.413631	6.86477e-17
POM121	AL132989.1	0.429573	3.16164e-18
RANBP2	AL132989.1	0.519592	3.00863e-27
TPR	AL132989.1	0.476763	1.27047e-22
PGP	AC008610.1	0.703677	3.58184e-57
NUP85	AC110285.2	0.409257	1.55277e-16
ALDOA	AL355574.1	0.421228	1.61616e-17
NUP107	AL355574.1	0.43677	7.46239e-19
NUP188	AL355574.1	0.445674	1.19175e-19
NUP214	AL355574.1	0.451213	3.70383e-20
NUP37	AL355574.1	0.445902	1.13634e-19
NUP93	AL355574.1	0.435961	8.79248e-19
PGP	AC012510.1	0.540033	1.06902e-29
PPP2R1A	AC012510.1	0.512591	1.90442e-26
PGP	AC106820.3	0.417209	3.48965e-17
AAAS	ZNF529-AS1	0.518904	3.61314e-27
ALDOA	ZNF529-AS1	0.418246	2.86369e-17
NUP188	ZNF529-AS1	0.405276	3.23042e-16
NUP37	ZNF529-AS1	0.429417	3.26089e-18
NUP43	ZNF529-AS1	0.461633	3.87587e-21
NUP85	ZNF529-AS1	0.460813	4.64247e-21
PPP2R1A	ZNF529-AS1	0.518449	4.07809e-27
RAE1	ZNF529-AS1	0.456478	1.19555e-20
ALDOB	AC015689.1	0.407544	2.13054e-16
GCK	AC015689.1	0.696999	1.09978e-55
PKLR	AC015689.1	0.414845	5.46178e-17
AAAS	HCG18	0.502157	2.7569e-25
ADPGK	HCG18	0.464804	1.92019e-21
BPGM	HCG18	0.436161	8.44361e-19
GNPDA2	HCG18	0.5776	1.16036e-34
NDC1	HCG18	0.483786	2.45147e-23
NUP107	HCG18	0.578129	9.77233e-35
NUP133	HCG18	0.515355	9.2382e-27
NUP153	HCG18	0.600262	5.56925e-38
NUP155	HCG18	0.505356	1.22702e-25
NUP160	HCG18	0.530285	1.65118e-28
NUP188	HCG18	0.469789	6.27189e-22
NUP205	HCG18	0.537527	2.17903e-29
NUP210	HCG18	0.409523	1.47817e-16
NUP214	HCG18	0.504789	1.41712e-25
NUP35	HCG18	0.528399	2.77578e-28
NUP37	HCG18	0.497468	8.89309e-25
NUP43	HCG18	0.437968	5.84954e-19
NUP50	HCG18	0.401453	6.46852e-16
NUP54	HCG18	0.471477	4.27565e-22
NUP62	HCG18	0.509887	3.84101e-26
NUP85	HCG18	0.458088	8.42766e-21
NUP93	HCG18	0.45098	3.8922e-20
NUP98	HCG18	0.507006	8.05404e-26
PKM	HCG18	0.423192	1.1054e-17
POM121	HCG18	0.427698	4.57955e-18
POM121C	HCG18	0.512374	2.01514e-26
PPP2CA	HCG18	0.422929	1.16327e-17
PPP2R5D	HCG18	0.610225	1.58937e-39
RAE1	HCG18	0.489847	5.74588e-24
RANBP2	HCG18	0.553237	2.26678e-31
SEH1L	HCG18	0.50848	5.51843e-26
TPR	HCG18	0.552885	2.51766e-31
NUP85	AC132872.1	0.492359	3.12241e-24
NUP155	AC067852.2	0.454208	1.95134e-20
NUP160	AC067852.2	0.417618	3.22835e-17
NUP85	AC067852.2	0.474808	1.9951e-22
POM121C	AC067852.2	0.416851	3.73541e-17
TPR	AC067852.2	0.453282	2.38086e-20
AAAS	SNHG20	0.534929	4.53165e-29
ADPGK	SNHG20	0.516086	7.62082e-27
NUP107	SNHG20	0.473653	2.60098e-22
NUP188	SNHG20	0.406012	2.8232e-16
NUP35	SNHG20	0.460402	5.08088e-21
NUP37	SNHG20	0.493164	2.56573e-24
NUP43	SNHG20	0.407145	2.29285e-16
NUP62	SNHG20	0.441631	2.75971e-19
NUP85	SNHG20	0.598242	1.12813e-37
NUP93	SNHG20	0.48447	2.08419e-23
RAE1	SNHG20	0.440635	3.38811e-19
SEH1L	SNHG20	0.439879	3.9572e-19
PGP	AC011445.2	0.485155	1.77073e-23
GNPDA1	SMIM25	0.506251	9.76757e-26
HK3	SMIM25	0.647498	8.03645e-46
PKM	SMIM25	0.418962	2.49748e-17
ALDOB	AP001065.1	0.410548	1.22174e-16
PFKFB1	AP001065.1	0.487682	9.67872e-24
AAAS	ASH1L-AS1	0.407794	2.03461e-16
ALDOA	ASH1L-AS1	0.417691	3.18342e-17
GNPDA2	ASH1L-AS1	0.409266	1.55012e-16
NUP35	ASH1L-AS1	0.450743	4.09353e-20
NUP85	ASH1L-AS1	0.47338	2.76893e-22
PFKP	ASH1L-AS1	0.413402	7.16593e-17
PKM	ASH1L-AS1	0.423729	9.9594e-18
RANBP2	ASH1L-AS1	0.434774	1.11764e-18
TPR	ASH1L-AS1	0.404457	3.75121e-16
AAAS	AC124016.2	0.40469	3.59514e-16
GNPDA2	ANKRD10-IT1	0.449531	5.2943e-20
NUP153	ANKRD10-IT1	0.419796	2.12853e-17
NUP160	ANKRD10-IT1	0.502257	2.6881e-25
NUP214	ANKRD10-IT1	0.410673	1.19377e-16
NUP50	ANKRD10-IT1	0.469523	6.66075e-22
NUP54	ANKRD10-IT1	0.429045	3.51075e-18
NUP58	ANKRD10-IT1	0.498377	7.09807e-25
NUP98	ANKRD10-IT1	0.409704	1.42929e-16
POM121	ANKRD10-IT1	0.446214	1.06442e-19
RANBP2	ANKRD10-IT1	0.529998	1.78736e-28
TPR	ANKRD10-IT1	0.53641	2.98773e-29
BPGM	AP003486.1	0.434912	1.08694e-18
GNPDA2	AP003486.1	0.422641	1.22997e-17
POM121	AP003486.1	0.437172	6.87801e-19
RANBP2	AP003486.1	0.451839	3.24127e-20
PPP2R1A	LINC01578	0.410963	1.13091e-16
AAAS	ZNF793-AS1	0.452304	2.93498e-20
NUP107	ZNF793-AS1	0.42146	1.54534e-17
NUP85	ZNF793-AS1	0.433472	1.45255e-18
RAE1	ZNF793-AS1	0.417956	3.02679e-17
AAAS	AP005482.3	0.427727	4.55427e-18
SEH1L	AP005482.3	0.487983	9.00322e-24
GCK	AC026202.2	0.412927	7.83532e-17
ALDOA	AC006504.8	0.41858	2.68704e-17
NUP107	AC006504.8	0.420172	1.98032e-17
NUP37	AC006504.8	0.425087	7.64262e-18
NUP43	AC006504.8	0.43684	7.35793e-19
NUP62	AC006504.8	0.427264	4.98828e-18
NUP93	AC006504.8	0.421037	1.67684e-17
PKM	AC006504.8	0.401966	5.89588e-16
PPP2R1A	AC006504.8	0.43313	1.55564e-18
RAE1	AC006504.8	0.407764	2.04608e-16
GNPDA2	AC008764.2	0.417443	3.3376e-17
NUP153	AC008764.2	0.437409	6.55432e-19
NUP160	AC008764.2	0.461854	3.69186e-21
NUP58	AC008764.2	0.401381	6.55239e-16
NUP98	AC008764.2	0.40728	2.23693e-16
POM121	AC008764.2	0.544794	2.71684e-30
POM121C	AC008764.2	0.418481	2.73819e-17
RANBP2	AC008764.2	0.444597	1.49211e-19
TPR	AC008764.2	0.465484	1.65037e-21
