# Supplementary material for: Identification of Prognostic Glycolysis-Related lncRNA Signature in Tumor Immune Microenvironment of Hepatocellular Carcinoma
Source: Front Mol Biosci. 2021 Apr 22;8:645084. doi: 10.3389/fmolb.2021.645084 (PMC8100457; doi:10.3389/fmolb.2021.645084)
Supplement: Supplementary file 13 [file table4.xlsx]

## Sheet: S2
Table S2. 186 HCC cases in the training set
patient id	futime	fustat	AL031985.3	AL365203.2	MIR4435-2HG	AC015908.3	riskScore	risk
TCGA-K7-A5RG	1.42192	0	1.15539	1.52215	1.89911	0.911951	1.28512	high
TCGA-RC-A7SF	1.5863	0	0.432196	1.8457	2.3118	0.831383	1.14217	high
TCGA-DD-A116	4.44384	1	0.382778	1.1488	2.08393	2.32446	0.696586	low
TCGA-CC-5258	0.353425	1	1.81688	2.67295	1.87887	0.350261	2.03804	high
TCGA-G3-AAUZ	1.31507	0	0.165372	1.13756	1.37116	1.21943	0.800914	low
TCGA-DD-AAVP	7.53973	0	0.237915	0.407178	1.01108	1.43187	0.690597	low
TCGA-DD-A115	6.96438	1	0.379483	4.55276	1.69891	3.44402	0.717851	low
TCGA-G3-A5SK	2.03836	0	0.322891	0.483276	0.156823	1.00841	0.726012	low
TCGA-DD-AAW1	5.44932	0	0.195201	0.6308	0.727113	1.56035	0.655206	low
TCGA-DD-A3A3	1.46575	1	0.599645	1.33997	1.52568	0.336131	1.18773	high
TCGA-DD-A4NQ	1.02192	1	0.965157	4.64858	2.42371	2.48333	1.19458	high
TCGA-DD-A1EC	1.64932	0	1.03954	1.96142	0.912543	3.21175	0.649455	low
TCGA-CC-5259	0.684932	0	0.231489	2.00578	2.23062	1.64004	0.881708	low
TCGA-G3-A25X	4.87397	0	0.618821	5.43577	5.4836	0.648133	2.59813	high
TCGA-DD-AACS	4.94247	0	0.707861	0.4795	2.4333	3.77977	0.512152	low
TCGA-ED-A627	1.1589	0	0.616789	1.47832	1.43803	1.2884	0.940703	high
TCGA-DD-A1EG	3.7589	1	1.31314	2.13049	3.95771	0.837624	1.82655	high
TCGA-DD-AAEB	1.30959	0	0.222434	0.323672	1.91905	2.73367	0.53851	low
TCGA-DD-AADC	1.16438	1	3.54094	4.61344	3.33781	1.49534	3.66051	high
TCGA-DD-A4NS	6.72877	1	0.63639	2.69499	1.65716	1.7401	0.981182	high
TCGA-KR-A7K0	0.178082	1	0.55334	2.04732	3.16647	1.21854	1.20122	high
TCGA-MI-A75E	1.38904	0	0.711191	2.34897	2.45227	2.26886	0.920539	low
TCGA-2Y-A9H1	3.36712	1	0.385615	1.41355	2.56705	3.08997	0.620863	low
TCGA-DD-AACA	6.30411	0	0.361297	0.61348	0.812927	1.70362	0.668835	low
TCGA-K7-A5RF	1.72877	0	0.322149	0.680783	0.512812	2.99731	0.463067	low
TCGA-ZP-A9CZ	1.93425	0	0.702199	1.29582	1.50219	1.78182	0.840296	low
TCGA-DD-AACN	3.56712	0	0.840485	1.91034	0.875073	1.24284	1.00267	high
TCGA-5R-AA1D	1.23014	0	0.964201	1.39969	2.34183	1.60689	1.05177	high
TCGA-XR-A8TG	2.46027	0	0.447973	1.85314	1.86822	1.18563	1.00021	high
TCGA-BC-A10T	2.29315	1	0.560769	0.912887	1.17054	1.78706	0.745466	low
TCGA-ZP-A9D4	1.08219	0	0.470684	0.614612	0.437459	1.62013	0.678227	low
TCGA-EP-A2KC	0.0520548	1	0.699874	1.77703	2.98148	0.947901	1.28164	high
TCGA-DD-A73F	2.9726	0	0.348776	1.77961	0.758791	2.90837	0.550489	low
TCGA-EP-A26S	1.66575	0	0.793239	0.643913	0.287414	1.81421	0.701759	low
TCGA-UB-A7MD	0.142466	1	0.163909	1.53188	3.51826	0.789174	1.17325	high
TCGA-BC-A69I	1.06027	0	0.307731	0.604025	1.53602	2.20785	0.624675	low
TCGA-RC-A7S9	1.75342	0	0.381792	1.55845	1.12162	1.43722	0.822652	low
TCGA-DD-AACW	3.90137	0	0.243204	1.21389	0.22369	4.74714	0.296457	low
TCGA-CC-A8HU	0.942466	1	1.41073	1.00338	3.12232	0.238408	1.77963	high
TCGA-DD-AADP	1.25479	0	0.398782	3.96994	1.22963	4.8801	0.447218	low
TCGA-G3-AAV2	1.01918	0	0.563651	0.850646	1.05673	3.55369	0.466096	low
TCGA-EP-A3JL	0.830137	0	0.392468	3.20123	4.17904	0.673702	1.65658	high
TCGA-LG-A9QC	1.16438	0	0.368936	1.76824	0.566917	2.04345	0.675997	low
TCGA-FV-A495	0.00273973	0	0.228862	2.07082	4.06713	1.35803	1.16133	high
TCGA-ED-A66Y	0.810959	1	0.989932	8.15347	0.888381	1.11923	2.09253	high
TCGA-DD-A1EI	0.50137	0	1.49346	7.87035	2.35493	1.43119	2.55328	high
TCGA-ED-A5KG	2.33973	0	1.10385	2.04048	2.55267	1.03321	1.38987	high
TCGA-DD-AACB	6.36712	0	1.09358	0.400611	2.66607	0.401374	1.3869	high
TCGA-DD-AAD2	1.80274	0	0.524327	2.79	1.80973	1.36459	1.07229	high
TCGA-DD-AADL	1.74247	0	1.40592	3.54614	1.25488	2.6405	1.0285	high
TCGA-DD-AAE1	1.51233	0	0.315299	2.04376	1.08339	2.06665	0.71959	low
TCGA-ZP-A9D1	0.0575342	0	0.245985	2.75081	2.26539	1.53188	0.988415	high
TCGA-GJ-A3OU	2.40822	0	0.728117	3.5857	3.22303	0.976192	1.59346	high
TCGA-WX-AA46	2.07123	0	0.184375	0.965848	0.201862	3.34292	0.405372	low
TCGA-CC-A3MA	0.830137	1	3.93599	7.51607	7.05765	0.341453	11.2078	high
TCGA-MR-A520	0.627397	0	0.242735	0.596631	0.545954	4.01455	0.346766	low
TCGA-BC-A10Y	1.94795	1	0.55926	0.493503	0.608512	1.26714	0.766567	low
TCGA-BC-A69H	1.21644	0	0.651103	4.693	4.97125	0.022899	2.69401	high
TCGA-KR-A7K7	2.60548	0	0.492492	1.49423	4.0074	1.44712	1.14878	high
TCGA-G3-AAV7	0.989041	0	1.33587	2.68585	3.06891	0.138146	2.11939	high
TCGA-DD-AADV	1.5726	0	0.54774	1.0545	0.975422	1.59234	0.775763	low
TCGA-YA-A8S7	1.12877	1	1.45492	2.1427	5.51487	0.547183	2.42976	high
TCGA-DD-A11A	0.216438	0	0.386937	4.12265	1.36425	1.1777	1.18404	high
TCGA-CC-A7IJ	1.04658	0	1.98508	3.75514	6.59421	0.267881	4.07185	high
TCGA-BD-A3EP	1.12055	0	0.687794	4.05973	2.35287	1.15973	1.43814	high
TCGA-UB-A7MC	1.36986	0	0.296688	0.501583	1.32838	0.772146	0.869485	low
TCGA-XR-A8TD	2.82192	0	0.425802	1.19824	1.78445	0.453342	1.10826	high
TCGA-DD-AAE4	1.66575	0	0.215897	0.365267	1.33574	3.78531	0.387485	low
TCGA-5R-AA1C	1.42466	0	0.610409	0.572578	7.55173	3.46608	0.94319	high
TCGA-DD-AAEE	2.21918	0	0.496486	2.49107	1.61847	1.75361	0.913873	low
TCGA-RC-A7SH	1.28219	0	0.655154	2.77877	3.42425	2.23791	1.05973	high
TCGA-DD-AAD3	3.54795	0	0.813321	0.657723	1.48116	1.25804	0.926592	low
TCGA-G3-A5SM	1.42466	0	0.435642	2.38585	2.61576	1.26984	1.11787	high
TCGA-DD-AADD	3.3726	0	1.57661	0.4368	0.322831	1.6258	0.914837	low
TCGA-G3-A25V	2.35616	0	0.6035	3.38852	2.06508	1.55125	1.14605	high
TCGA-GJ-A9DB	0.183562	1	0.892514	3.67743	1.35129	0.751498	1.46413	high
TCGA-5R-AAAM	0.126027	1	0.147727	1.5939	1.09067	0.889079	0.882605	low
TCGA-DD-A3A9	2.55068	1	0.550009	2.68266	6.02686	3.39386	1.00038	high
TCGA-CC-5264	0.279452	1	1.1222	2.04948	0.794187	1.6446	0.990477	high
TCGA-2Y-A9H6	0.978082	0	0.307116	1.02165	1.28564	3.54977	0.450811	low
TCGA-UB-AA0V	0.860274	0	0.349551	1.42301	0.630261	2.8759	0.5274	low
TCGA-BC-A10S	3.89863	1	0.22185	2.57136	1.47766	2.07176	0.770693	low
TCGA-G3-A5SL	1.70137	0	0.753489	0.603346	1.37557	5.79621	0.280384	low
TCGA-BW-A5NP	0	0	1.17447	1.31144	2.44227	0.759412	1.39337	high
TCGA-RC-A7SK	1.29315	0	0.250729	1.07277	1.40641	2.63053	0.571079	low
TCGA-FV-A4ZQ	0.0328767	0	1.30455	0.722854	0.548431	0.72601	1.12054	high
TCGA-DD-A73D	1.89863	0	0.759819	0.748984	1.88081	1.46715	0.911005	low
TCGA-2Y-A9H4	3.97808	0	0.463688	0.690066	0.634584	1.77999	0.668903	low
TCGA-DD-A39W	2.26575	1	0.39481	0.798195	0.13736	1.31832	0.706975	low
TCGA-G3-A5SI	2.10411	1	0.25055	1.29645	0.963431	0.702229	0.912772	low
TCGA-2Y-A9GV	6.93699	1	0.634399	1.37572	1.01183	1.85744	0.772645	low
TCGA-DD-AA3A	1.12329	1	0.419267	11.3144	11.9892	0.242481	10.1449	high
TCGA-G3-A5SJ	1.91233	0	2.07739	6.3613	2.28083	0.44498	3.31262	high
TCGA-DD-AAW3	4.47397	0	1.00517	0.422374	0.282794	2.27747	0.648642	low
TCGA-ED-A97K	0.0164384	0	0.49363	4.04646	2.45744	1.15833	1.37067	high
TCGA-G3-AAV4	0.0739726	1	0.802895	0.382361	0.386454	1.20458	0.808709	low
TCGA-WX-AA47	1.52329	1	0.694226	1.8342	1.12339	1.08901	1.01692	high
TCGA-DD-A39X	4.6411	1	1.02456	1.16934	4.25081	1.3976	1.35377	high
TCGA-G3-A25T	4.25479	0	0.293845	5.07271	4.00531	0.182082	2.18016	high
TCGA-EP-A3RK	0.994521	0	0.603853	1.35159	4.84826	1.34106	1.31591	high
TCGA-DD-A4ND	7.52329	0	0.764559	1.99882	1.07189	1.6821	0.903075	low
TCGA-ZP-A9D2	2.09589	1	4.55682	3.10494	3.16281	0.53487	5.31313	high
TCGA-MR-A8JO	0.90411	0	1.23724	3.2617	4.39479	0.850998	2.10095	high
TCGA-CC-A7IG	0.819178	1	0.900443	3.35717	2.33263	0.472801	1.69313	high
TCGA-DD-AACD	1.04384	1	0.316793	1.17864	0.818612	1.41706	0.754169	low
TCGA-DD-A73E	0.120548	0	0.56562	0.253908	0.323259	2.07536	0.590691	low
TCGA-G3-A7M5	1.22466	0	0.0727323	0.240536	0.582096	2.50283	0.468968	low
TCGA-CC-A3MC	0.994521	0	0.400223	2.44787	2.66573	0.837366	1.25017	high
TCGA-DD-AAE7	1.76438	0	0.233506	1.7607	0.396188	4.5916	0.331925	low
TCGA-ZP-A9CY	2.14247	0	0.299641	2.52537	0.604323	2.93463	0.57326	low
TCGA-MI-A75C	0.79726	0	0.844208	2.93868	7.32705	3.15963	1.37051	high
TCGA-ES-A2HT	1.2	1	0.142805	0.857823	3.66935	1.68935	0.876774	low
TCGA-BC-A110	5.79726	1	0.228544	1.26445	1.65394	1.85437	0.724956	low
TCGA-DD-A118	9.41644	0	0.260426	0.579669	0.957491	1.06086	0.774012	low
TCGA-DD-AAD5	3.68493	0	1.01902	2.58881	3.60176	0.709995	1.74522	high
TCGA-G3-A7M6	1.73151	0	1.45362	7.60942	3.40879	0.234007	3.73313	high
TCGA-BC-4073	2.32603	0	0.894257	1.37306	1.61165	0.834635	1.15684	high
TCGA-MI-A75G	1.91233	0	0.258686	1.34315	2.02686	2.65557	0.625564	low
TCGA-DD-AADU	1.51781	0	0.264392	1.20484	0.407148	4.22348	0.347548	low
TCGA-UB-A7MB	1.64658	0	0.36317	1.64672	2.29085	2.31265	0.748466	low
TCGA-DD-A1EE	0.956164	1	1.19061	0.30428	3.27949	1.55742	1.12338	high
TCGA-BW-A5NQ	0	0	2.2782	0.464705	1.57442	0.248775	1.84216	high
TCGA-5C-AAPD	0.0547945	0	1.10234	0.618347	2.09496	1.02066	1.14219	high
TCGA-DD-AACV	4.19452	0	0.753104	0.44162	0.148973	2.74984	0.526441	low
TCGA-G3-A3CH	2.13699	0	0.599963	3.0191	0.401035	1.35324	0.968695	high
TCGA-BC-A112	0.419178	1	1.83588	16.9192	2.45129	0.353923	9.77049	high
TCGA-3K-AAZ8	1.08493	0	0.845842	0.737292	0.350322	1.65101	0.755738	low
TCGA-RG-A7D4	3.00822	0	0.748908	0.759087	2.37934	0.237049	1.31345	high
TCGA-CC-A7IF	1.77808	1	0.327286	1.34881	1.42654	1.46331	0.812551	low
TCGA-CC-A7II	1.09315	0	1.30538	4.39138	0.990553	0.0987595	2.03092	high
TCGA-DD-AAED	2.09041	0	0.690317	3.70589	1.80088	6.17372	0.362597	low
TCGA-DD-AACK	0.0246575	0	0.704059	2.96856	1.4922	2.84238	0.763817	low
TCGA-G3-A3CK	1.60274	0	0.627209	0.706004	1.79396	1.92913	0.767231	low
TCGA-BC-A10X	2.10959	1	0.242114	0.809856	0.604564	2.2204	0.564511	low
TCGA-DD-A4NH	2.51233	0	1.09088	4.8678	4.23687	0.380032	2.64103	high
TCGA-EP-A12J	1.56164	0	0.560468	0.353264	0.244596	3.77532	0.382648	low
TCGA-G3-A25U	4.48219	0	0.287722	1.65128	0.518642	1.55522	0.734468	low
TCGA-BC-4072	4.08219	1	0.363391	2.04869	1.99237	0.180804	1.30435	high
TCGA-ES-A2HS	1.88493	1	0.13604	2.17224	1.90905	0.937194	1.0082	high
TCGA-G3-A3CI	0.493151	0	0.126941	0.987398	0.880215	2.70904	0.505119	low
TCGA-DD-AADW	1.60822	0	0.899125	3.67018	1.23606	0.735434	1.45384	high
TCGA-DD-A4NP	9.06301	0	0.322642	1.18784	0.351813	4.13387	0.359083	low
TCGA-DD-A1EA	6.61644	0	0.377558	0.919925	0.789296	1.09687	0.808598	low
TCGA-2Y-A9GS	1.98356	1	1.51108	4.12039	1.74615	1.96633	1.41243	high
TCGA-5C-A9VH	0.882192	0	0.556495	1.44133	2.55975	1.39749	1.00955	high
TCGA-DD-AADN	2.46027	0	0.654157	0.996164	3.41884	0.47511	1.37715	high
TCGA-DD-AADY	1.52055	0	0.596078	2.22364	0.702228	1.27553	0.937478	low
TCGA-DD-AADA	3.37808	0	0.548613	0.480266	1.41097	4.1574	0.397244	low
TCGA-BC-A5W4	1.49863	1	0.57928	0.796691	0.62444	1.11771	0.828646	low
TCGA-DD-A4NL	4.68767	0	0.127136	1.04873	1.04657	2.19797	0.589845	low
TCGA-G3-A25S	1.13973	1	0.562905	1.76047	8.64653	1.2026	2.1144	high
TCGA-BC-A3KF	0.0219178	0	0.73254	0.598782	0.459917	3.54263	0.449094	low
TCGA-T1-A6J8	0.0630137	0	0.536877	3.63646	1.01589	0.98185	1.19164	high
TCGA-DD-AAVS	4.99452	0	0.439058	1.0883	1.70464	5.20758	0.323368	low
TCGA-DD-AADB	3.40274	0	1.24631	7.04316	1.47942	0.713586	2.3762	high
TCGA-DD-AAE9	1.97808	0	0.109222	0.705914	2.88615	1.25885	0.876644	low
TCGA-DD-A4NF	2.58082	0	1.16611	1.02299	0.545964	2.45585	0.712736	low
TCGA-HP-A5MZ	0.249315	1	0.504863	3.22068	2.21012	1.23549	1.20365	high
TCGA-DD-AAW2	5.08219	0	0.691545	0.34176	0.432327	1.90166	0.654882	low
TCGA-MI-A75H	2.04658	0	0.499342	0.664443	2.33858	4.22995	0.432801	low
TCGA-DD-AACF	1	1	0.417169	1.1175	1.07943	3.13184	0.512278	low
TCGA-DD-AACI	4.43288	0	0.305651	2.24085	9.71014	5.8195	0.708942	low
TCGA-UB-A7ME	1.33151	0	0.655628	1.21032	0.75347	0.901083	0.949115	high
TCGA-CC-A7IK	0.717808	1	1.31003	1.83756	2.55534	0.607427	1.61419	high
TCGA-CC-5262	0.282192	1	2.13051	1.8118	3.3974	1.62948	1.73567	high
TCGA-DD-AAVQ	7.47397	0	0.579631	0.759974	1.20284	1.50852	0.794921	low
TCGA-DD-A3A5	8.56164	1	0.127103	0.432358	0.894591	1.58308	0.636377	low
TCGA-RC-A7SB	1.61096	0	0.443808	2.39805	1.82951	1.72366	0.918199	low
TCGA-DD-AAVW	6.34795	0	0.616871	2.09029	1.35896	1.90183	0.850479	low
TCGA-FV-A2QR	1.59178	1	0.50928	3.49884	2.91059	1.12987	1.37472	high
TCGA-2Y-A9H0	10.0685	0	1.13155	0.474362	1.125	0.580688	1.14434	high
TCGA-DD-AAVY	5.39726	0	0.568915	0.481263	2.82968	1.83131	0.843786	low
TCGA-G3-A25Y	1.23836	1	1.08698	2.77895	2.2285	0.923118	1.48481	high
TCGA-EP-A2KB	1.63288	1	0.339394	1.31507	1.14498	3.34045	0.487874	low
TCGA-DD-A3A6	8.92603	1	0.433192	1.95503	4.85019	0.471937	1.6642	high
TCGA-BD-A2L6	3.73425	0	0.610901	1.29878	0.786663	1.68724	0.775875	low
TCGA-CC-5260	0.238356	1	1.03623	10.9727	2.75375	0	4.64545	high
TCGA-FV-A3R2	0.531507	1	1.08125	1.12532	1.21928	1.77039	0.899668	low
TCGA-2Y-A9GW	3.48219	1	0.351979	2.83669	2.35067	0.845579	1.23841	high
TCGA-DD-AAD1	1.54521	0	1.7216	3.64388	0.896323	1.2315	1.57592	high
TCGA-CC-A1HT	0.276712	1	1.35912	3.52667	10.8611	0.0647833	5.48798	high
TCGA-FV-A3I1	0.676712	1	1.14147	1.35899	1.7666	0.822971	1.2687	high
TCGA-DD-AADS	1.29863	0	0.22348	0.114029	2.93734	7.25638	0.184943	low
TCGA-DD-A39V	1.76164	1	0.761872	1.88669	6.21356	1.21612	1.74531	high
TCGA-2Y-A9H9	1.90959	0	0.382286	1.78198	1.39453	0.978056	0.975503	high
TCGA-DD-AACG	1.28493	1	0.945246	2.50232	2.93809	2.14169	1.0923	high
